1 **Circadian protein regulation in the green lineage I. A phospho-dawn of**  
2 **protein modification anticipates light onset in the picoeukaryote *O. tauri***

3  
4 **Running title: Algal phospho- and protein rhythms**

5  
6 **Zeenat B. Noordally<sup>1,2\*</sup>, Matthew M. Hindle<sup>1\*</sup>, Sarah F. Martin<sup>1,3</sup>, Daniel D. Seaton<sup>1,4</sup>,**  
7 **T. Ian Simpson<sup>5</sup>, Thierry Le Bihan<sup>1\*\*</sup>, Andrew J. Millar<sup>1\*\*</sup>**

8  
9 <sup>1</sup>SynthSys and School of Biological Sciences, University of Edinburgh, Edinburgh EH9 3BF,  
10 UK. <sup>5</sup>Institute for Adaptive and Neural Computation, School of Informatics, University of  
11 Edinburgh, Edinburgh EH8 9AB, UK.

12 \* These authors contributed equally to this work.

13 \*\* corresponding authors: [tlebihan@gmail.com](mailto:tlebihan@gmail.com); [andrew.millar@ed.ac.uk](mailto:andrew.millar@ed.ac.uk) +44 131 651 3325

14  
15 <sup>2</sup> Present address: Norfolk County Council, Community and Environmental Services, County  
16 Hall, Martineau Lane, Norwich NR1 2DH, United Kingdom.

17 <sup>3</sup> Present address: Office of the Chief Statistician and Strategic Analysis, Scottish  
18 Government, Edinburgh EH1 3DG, UK

19 <sup>4</sup> Present address: GlaxoSmithKline, Stevenage SG1 2NY, UK

20  
21 Author; Email, ORCID:

22 Zeenat Noordally; [zeenat.noordallyed@gmail.com](mailto:zeenat.noordallyed@gmail.com), 0000-0003-2817-1330

23 Matthew Hindle; [matthew.hindle@gmail.com](mailto:matthew.hindle@gmail.com), 0000-0002-6870-4069

24 Sarah F. Martin; [sarahfriedemartin@gmail.com](mailto:sarahfriedemartin@gmail.com), -

25 Daniel Seaton; [daniel.d.seaton@gmail.com](mailto:daniel.d.seaton@gmail.com), 0000-0002-5222-3893

26 Ian Simpson; [Ian.Simpson@ed.ac.uk](mailto:Ian.Simpson@ed.ac.uk), 0000-0003-0495-7187

27 Thierry Lebihan; [tlebihan@gmail.com](mailto:tlebihan@gmail.com), 0000-0003-0498-8063

28 Andrew Millar; [andrew.millar@ed.ac.uk](mailto:andrew.millar@ed.ac.uk), 0000-0003-1756-3654

29 URL <https://www.ed.ac.uk/biology/centre-engineering-biology>

30  
31 Submitted 13 December 2022; Main text: ~5000 words, excluding Methods 2730 words; 5  
32 figures; 11 Supplementary Figures; 6 Supplementary Tables.

|    |                                                                          |    |
|----|--------------------------------------------------------------------------|----|
| 33 | <b>Table of Contents</b>                                                 |    |
| 34 | Highlight (<30 words) .....                                              | 3  |
| 35 | Abstract (<200 words) .....                                              | 3  |
| 36 | Keywords and Abbreviations.....                                          | 3  |
| 37 | Introduction.....                                                        | 4  |
| 38 | Materials and Methods (2730 words) .....                                 | 6  |
| 39 | Results.....                                                             | 11 |
| 40 | Diel rhythmicity of the transcriptome, proteome and phosphoproteome..... | 11 |
| 41 | Daytime peaks of protein abundance .....                                 | 13 |
| 42 | Unusual, night-time proteins suggest a ‘dark state’ .....                | 13 |
| 43 | A phospho-dawn of protein modification .....                             | 14 |
| 44 | Functions of proteins with rhythmic phospho-motifs .....                 | 15 |
| 45 | Phase-specific target sites.....                                         | 15 |
| 46 | Rhythmic regulation of the kinome.....                                   | 16 |
| 47 | Discussion.....                                                          | 16 |
| 48 | The diel proteome and phosphoproteome .....                              | 16 |
| 49 | The ‘dark state’ is indirectly associated with lipid synthesis .....     | 17 |
| 50 | Supplementary Data Summary .....                                         | 18 |
| 51 | Acknowledgements.....                                                    | 19 |
| 52 | Author Contributions .....                                               | 19 |
| 53 | Conflicts of Interest.....                                               | 19 |
| 54 | Data Availability.....                                                   | 19 |
| 55 | REFERENCES .....                                                         | 20 |
| 56 | FIGURE LEGENDS .....                                                     | 27 |
| 57 | FIGURES .....                                                            | 28 |
| 58 | Supplementary Figure Legends .....                                       | 33 |
| 59 | Supplementary Figures .....                                              | 35 |
| 60 |                                                                          |    |
| 61 |                                                                          |    |

## 62 Highlight (<30 words)

63 The phosphorylation of most protein sites was rhythmic under light-dark cycles, and  
64 suggested circadian control by particular kinases. Day-peaking, rhythmic proteins likely  
65 reflect light-stimulated protein synthesis in this microalga.

## 66 Abstract

67 Diel regulation of protein levels and protein modification had been less studied than transcript  
68 rhythms. Here, we compare transcriptome data under light-dark cycles to partial proteome and  
69 phosphoproteome data, assayed using shotgun mass-spectrometry, from the alga *Ostreococcus*  
70 *tauri*, the smallest free-living eukaryote. 10% of quantified proteins but two-thirds of  
71 phosphoproteins were rhythmic. Mathematical modelling showed that light-stimulated protein  
72 synthesis can account for the observed clustering of protein peaks in the daytime. Prompted by  
73 night-peaking and apparently dark-stable proteins, we also tested cultures under prolonged  
74 darkness, where the proteome changed less than under the diel cycle. The dark-stable,  
75 prasinophyte-specific proteins were also reported to accumulate when *O. tauri* formed lipid  
76 droplets. In the phosphoproteome, 39% of rhythmic phospho-sites reached peak levels just  
77 before dawn. This anticipatory phosphorylation suggests that a clock-regulated phospho-dawn  
78 prepares green cells for daytime functions. Acid-directed and proline-directed protein  
79 phosphorylation sites were regulated in antiphase, implicating the clock-related, casein kinases  
80 1 and 2 in phase-specific regulation, alternating with the CMGC protein kinase family.  
81 Understanding the dynamic phosphoprotein network should be facilitated by the minimal  
82 kinome and proteome of *O. tauri*. The data are available from ProteomeXchange, with  
83 identifiers PXD001734, PXD001735 and PXD002909. This submission updates a previous  
84 version, posted on bioRxiv on 4th April 2018, as  
85 <https://www.biorxiv.org/content/10.1101/287862v1>

## 86 Keywords and Abbreviations

87 **Keywords:** Systems biology; light signalling; proteomics; phosphoproteomics; photoperiod;  
88 marine microalgae; photosynthetic pico-eukaryotes

89  
90 **Abbreviations:** PM, phosphopeptide motif; LD, light-dark cycles; ZT, Zeitgeber Time; DA,  
91 dark adaptation; PC, principal component; CK1, casein kinase 1; CK2, casein kinase 2;  
92 GSK3, Glycogen Synthase Kinase 3; CMGC, Cyclin-dependent kinase, Mitogen-activated  
93 protein kinase, Glycogen synthase kinase, CDC-like kinase; CCA1, Circadian Clock  
94 Associated 1 protein.

95

## 96 Introduction

97 Responses to light are critical for organisms of the green lineage (Noordally and Millar,  
98 2015; Paaanen *et al.*, 2021). The rapid effects of photosynthetic light harvesting, for example  
99 on redox state and sugar metabolism, are complemented by signalling photoreceptors  
100 (Whitelam and Halliday, 2007) and the slower, 24-hour regulation by the biological clock  
101 (Millar, 2016; Creux and Harmer, 2019). Circadian regulation allows organisms to anticipate  
102 the predictable, day-night transitions of the diel cycle, complementing the responses to faster  
103 changes in light levels (Troein *et al.*, 2011). Mehta *et al.* (2021) refer to these as  
104 ‘anticipatory’ and ‘reactive’ regulation. At the macromolecular level, the transcriptomes in  
105 the green lineage show widespread and overlapping regulation of mRNA abundance by both  
106 light and circadian signals (see below), whereas the diel regulation of proteins and their post-  
107 translational modifications had been less studied (Mehta *et al.*, 2021). We addressed that gap  
108 using a minimal biological system, focussing on protein phosphorylation.

109  
110 Phosphorylation of an existing protein is energetically inexpensive, occurs rapidly and can  
111 then alter protein activity through conformational change or intermolecular recognition  
112 (Khoury *et al.*, 2011). These characteristics seem fitted to reactive regulation. Some plant  
113 photoreceptor proteins include protein kinases that initiate light signalling (Christie, 2007;  
114 Djouani-Tahri *et al.*, 2011a).

115  
116 Protein synthesis is not only far slower but also among the costliest macromolecular  
117 processes (Scott *et al.*, 2010; Karr *et al.*, 2012), seemingly more suited to anticipatory  
118 regulation. Rhythmic regulation might then provide a selective advantage, loosely  
119 summarised as making proteins when they are needed in the diel cycle (Laloum and  
120 Robinson-Rechavi, 2022). That reasoning helped to interpret the co-regulation of functional  
121 clusters of RNAs, when transcriptome studies demonstrated that over 50% of Arabidopsis  
122 RNAs can be rhythmic under diel, light-dark cycles (LD) (Smith *et al.*, 2004; Blasing *et al.*,  
123 2005; Michael *et al.*, 2008). Most strikingly, almost the whole transcriptome of the marine  
124 unicellular alga *Ostreococcus tauri* was rhythmic in controlled conditions (Monnier *et al.*,  
125 2010) and this was also the most-rhythmic taxon among the diverse plankton of a Pacific  
126 timeseries (Kolody *et al.*, 2019). The clock might also allow anticipation, to ensure that the  
127 proteins had been fully synthesised and assembled to their active state by the appropriate  
128 time.

129  
130 Proteomic data, in contrast, revealed that most detected proteins had stable levels, with an  
131 average half-life >6 days in the model plant *Arabidopsis thaliana* (Li *et al.*, 2017), suggesting  
132 little scope for diel rhythmicity. Timeseries under constant light or a diel cycle found up to  
133 6% of rhythmic proteins (Baerenfaller *et al.*, 2012, 2015)(Choudhary *et al.*, 2016; Uhrig *et al.*,  
134 2021; Krahmer *et al.*, 2022). The most short-lived, regulatory proteins are harder to  
135 detect, but such proteins seem to be exceptions to the general protein stability, consistent with  
136 mammalian systems (Doherty *et al.*, 2009). Global regulation of protein synthesis is also  
137 clearly relevant in plants and algae (Piques *et al.*, 2009; Juntawong and Bailey-Serres, 2012;  
138 Pal *et al.*, 2013; Misra *et al.*, 2015; Ishihara *et al.*, 2015). In this context, circadian RNA  
139 regulation was proposed to offer a selective advantage through seasonal adaptation to day-  
140 length on a timescale of weeks (Seaton *et al.*, 2018).

141  
142 More protein phosphorylation sites change over the diel cycle, compared to protein levels  
143 (Kusakina and Dodd, 2012; Mehta *et al.*, 2021). Protein phosphorylation in plants and algae  
144 is most directly light-regulated by the photoreceptor kinases (Christie, 2007; Djouani-Tahri *et al.*  
145 *et al.*, 2011a), though light also affects the broader phosphoproteome (Turkina *et al.*, 2006;

146 Boex-Fontvieille *et al.*, 2014; Schönberg *et al.*, 2017), for example affecting 25% of  
147 Arabidopsis phosphopeptides within 30 minutes (Uhrig *et al.*, 2021). Circadian studies in  
148 Arabidopsis under constant light found up to 23% rhythmic phosphopeptides (Choudhary *et*  
149 *al.*, 2015; Kraemer *et al.*, 2022). These studies suggest that light responses and the circadian  
150 clock in Arabidopsis each control five- to ten-fold more phosphopeptides than the diel  
151 rhythm of total protein level, so it is also important to understand which phospho-regulators  
152 mediate these effects.

153

154 The amino acid sequences of rhythmically-regulated phosphosites have implicated a range of  
155 protein kinases with overlapping contributions in Arabidopsis (Choudhary *et al.*, 2015; Uhrig  
156 *et al.*, 2021; Kraemer *et al.*, 2022). However, ~1000 protein kinases shape the  
157 phosphoproteome in Arabidopsis (Champion *et al.*, 2004) including several in plastids  
158 (Baginsky and Gruijsem, 2009), compared to half that number in the human genome  
159 (Manning *et al.*, 2002). Of particular interest, the casein kinases (CK1, CK2) and Glycogen  
160 Synthase Kinase 3 (GSK3), affect the circadian timing of all organisms suitably studied  
161 (Mehra *et al.*, 2009). These kinases have central positions in the yeast kinase-target network  
162 (Breitkreutz *et al.*, 2010) and are highly conserved (Hindle *et al.*, 2014), in contrast to  
163 photoreceptor proteins or circadian transcription factors (Noordally and Millar, 2015; Dunlap  
164 and Loros, 2017).

165

166 Here, we compare the prevalence of proteomic and phosphoproteomic regulation under LD  
167 cycles, using *O. tauri* as a minimal model for the green lineage (Noordally and Millar, 2015).  
168 This alga not only has a ubiquitously-rhythmic transcriptome, but its genome is also reduced  
169 to 13Mbp (Blanc-Mathieu *et al.*, 2014), likely due to selection pressure to reduce cell size to  
170 1-2µm (Courties *et al.*, 1994). Its 7699 protein-coding genes include just 133 protein kinases  
171 that represent the core families for eukaryotic signalling (Hindle *et al.*, 2014) and a minimal  
172 set of Arabidopsis clock gene homologues (Corellou *et al.*, 2009; Djouani-Tahri *et al.*,  
173 2011b; Troein *et al.*, 2011; Ocone *et al.*, 2013). CK1 and CK2 modulate circadian timing in  
174 the light, with widespread effects on the algal phosphoproteome (Le Bihan *et al.*, 2011, 2015;  
175 van Ooijen *et al.*, 2013). A non-transcriptional, 24-hour oscillator of unknown mechanism  
176 was also revealed under prolonged darkness, when transcription stops in this organism  
177 (O'Neill *et al.*, 2011; van Ooijen *et al.*, 2011; Edgar *et al.*, 2012; Bouget *et al.*, 2014; Feeney  
178 *et al.*, 2016). In cyanobacteria, the non-transcriptional clock is driven by rhythmic protein  
179 phosphorylation, so rhythmic protein kinase activities could also be relevant in *O. tauri* (van  
180 Ooijen and Millar, 2012; Wong and O'Neill, 2018).

181

182 Our results reveal widespread daily rhythms in both the proteome and phosphoproteome in *O.*  
183 *tauri*, including expected features such as the diel control of conserved, cell cycle phospho-  
184 regulators. Rather than rapid phosphorylation responses and slow, rhythmic anticipation in  
185 protein profiles, however, the level of many rhythmic proteins appears light-responsive,  
186 whereas much of the rhythmic phosphoproteome anticipates dawn. The phosphosite  
187 sequences strongly implicate phase-specific protein kinase classes. Moreover, we identify a  
188 set of rhythmic, algal-specific proteins that accumulate in prolonged darkness and were also  
189 identified in conditions that promote the formation of lipid droplets.

## 190 Materials and Methods (2730 words)

### 191 Materials

192 Chemicals were purchased from Sigma-Aldrich (now a subsidiary of Merck Life Science UK  
193 Ltd, Dorset, UK) unless otherwise stated. Main solvent, acetonitrile and water for liquid  
194 chromatography– dual mass spectrometry (LC-MSMS) and sample preparation were HPLC  
195 quality (Thermo Fisher Scientific, Loughborough, UK). Formic acid was Suprapure 98-100%  
196 (Merck) and trifluoroacetic acid (TFA) was 99% purity sequencing grade. Porcine trypsin  
197 TPCK treated was from Worthington (Lorne Laboratories, Reading, UK). All HPLC-MS  
198 connectors and fittings were from Upchurch Scientific (Hichrom, Theale, UK) or Valco  
199 (RESTEK, High Wycombe, UK). % are expressed in v/v.

### 201 *O. tauri* media and culturing

202 *Ostreococcus tauri* OTTH95 were cultured as previously described (van Ooijen *et al.*, 2012),  
203 supplemented with 0.22  $\mu\text{m}$  filtered 50  $\mu\text{g ml}^{-1}$  ampicillin, neomycin and kanamycin  
204 antibiotics in vented tissue culture flasks (Sarstedt, Leicester, UK). Cultures were maintained  
205 by splitting weekly at 1:50 dilution. In preparation for proteomics experiments, cultures were  
206 grown in growth media supplemented with 200 mM sorbitol and 0.4% glycerol prior to  
207 harvesting (O'Neill *et al.*, 2011). Cells were cultured under cycles of 12 hour light/ 12 hour  
208 dark (LD) at 20°C in a controlled environment chamber (MLR-350, Sanyo Gallenkamp,  
209 Loughborough, UK) at a light intensity of 17.5  $\mu\text{Em}^{-2} \text{s}^{-1}$  white fluorescent light filtered by  
210 724 Ocean Blue filter (LEE Filters Worldwide, Andover, UK).

### 212 *O. tauri* cell harvesting

213 Cells were grown for 7 days in LD and on the seventh day harvested, with five replications,  
214 at Zeitgeber Time (ZT) 0, 4, 8, 12, 16 and 20, where ZT0 corresponds to dawn. At ZT0 cells  
215 were harvested a few minutes before the lights went on and at ZT12, before the lights went  
216 off. 135 ml culture was harvested by centrifugation (4000 rpm, 10 min, 4°C) per sample  
217 replicate, each from a separate culture vessel. Pellets were resuspended in ice cold phosphate  
218 buffered saline solution (PBS). Cultures were centrifuged as before, pellets were air dried and  
219 then vortex-mixed in 250  $\mu\text{l}$  8M urea and stored at -80°C. For total cell lysate, cells were  
220 dissolved by sonication (Branson Ultrasonics) and diluted with 500  $\mu\text{l}$  dH<sub>2</sub>O.  
221 Cells were grown for 7 days in LD and on the eighth day the Dark Adaptation (DA)  
222 experiment cell harvests were performed at ZT24, 48, 72 and 96 in constant darkness with  
223 five replications. The samples were harvested and prepared as for the LD experiment.

### 225 Protein digestion

226 Samples were analysed by Bradford Assay (Bio-Rad, Watford, UK) and 400  $\mu\text{g}$  protein of  
227 each sample was used in the digestion. Samples were reduced in 10 mM dithiothreitol and 50  
228 mM ammonium bicarbonate, and alkylated with 25 mM iodoacetamide. Samples were  
229 digested overnight with 10  $\mu\text{g}$  (1:40 ratio) trypsin under agitation at room temperature at pH8  
230 in a total volume of 1 ml. Samples were cleaned on SPE BondElut 25 mg columns (Agilent  
231 Technologies, Stockport, UK) following the vendor instruction. 50  $\mu\text{l}$  (~20  $\mu\text{g}$ ) was removed  
232 and dried for LC-MS (Speedvac, Thermo Fisher Scientific). The remaining ~380  $\mu\text{g}$  were  
233 also dried in preparation for phosphopeptide enrichment, and stored at -20°C.

234



## 235 Phosphopeptide enrichment

236 Dried peptide samples (~380 µg) were sonicated in 50 µl solution 0 (2.5% acetonitrile, 0.5%  
237 TFA) and 100 µl solution 2 (80% acetonitrile, 0.5% TFA, 100% lactic acid). Titansphere  
238 Phos-TiO Kit spin tip-columns (GL Sciences, Tokyo, Japan) were washed with 40 µl solution  
239 1 (80% acetonitrile, 0.5% TFA). Samples were loaded on the spin tip-columns and passaged  
240 three times through a centrifuge; 5 min at 200 xg, 15 min incubation at room temperature and  
241 10 min at 200 xg. Spin tip-columns were subsequently washed once with solution 1, twice  
242 with solution 2 and twice with solution 1 for 2 min at 200x g. Phosphopeptides were eluted in  
243 two steps, first with 50 µl 5% ammonium hydroxide (5 min at 200 xg) and secondly, with 5%  
244 pyrrolidine solution. 20 µl 20% formic acid was added to lower the pH and samples were  
245 cleaned on Bond Elut OMIX C18 pipette tips (Agilent Technologies) following the  
246 manufacturer's instruction.

247

## 248 Protein and phosphoprotein quantification

249 15 µg protein from total *O. tauri* cell lysates were run on a Novex NuPAGE 4-12% Bis-Tris  
250 by SDS-PAGE with PeppermintStick Phosphoprotein Molecular Weight Standards and  
251 Spectra Multicolor Broad Range Protein Ladder (Thermo Fisher Scientific). The gel was  
252 fixed overnight (50% methanol, 40% ddH<sub>2</sub>O, 10% glacial acetic acid), washed in ddH<sub>2</sub>O and  
253 stained with Pro-Q Diamond Phosphoprotein Gel Stain (Invitrogen, now Thermo Fisher  
254 Scientific, Loughborough, UK) in the dark at 25°C following manufacturer's instructions.  
255 The gel was imaged on a Typhoon TRIO variable mode imager (GE Healthcare, Amersham,  
256 UK) at 532 nm excitation/ 580 nm emission, 450 PMT and 50 micron resolution. Images  
257 were processed using ImageQuant TL software (GE Healthcare, Amersham, UK). The gel  
258 was re-used for protein quantification using SYPRO Ruby Protein Gel Stain (Thermo Fisher  
259 Scientific, Loughborough, UK) following manufacturer's instructions and imaged using a UV  
260 transilluminator (Ultra-Violet Products Ltd, Cambridge UK). Protein and phosphoprotein  
261 bands were quantified using Image Studio Lite v 4.0 (LI-COR Biosciences, Cambridge, UK).

262

## 263 Protein per cell quantification

264 Cells were grown (as described above) and independent, triplicate cultures were harvested at  
265 the times indicated. Cultures were monitored using spectrophotometry at 600nm. Total  
266 protein was quantified using the Quick Start Bradford Assay following manufacturer  
267 instructions (Bio-Rad, Watford, UK). Cell number was estimated either by counting four  
268 fields of view per culture in a haemocytometer after trypan blue staining (Abcam protocols,  
269 Cambridge, UK), or by fluorescence-activated cell sorting (FACS). For FACS, a 1/200  
270 dilution of cells were transferred to fresh media containing 1X SYBR Green I Nucleic Acid  
271 Gel Stain (Invitrogen, now Thermo Fisher Scientific, Loughborough, UK) and FACS-  
272 counted (FACScan, BD Bioscience, Wokingham, UK) at a flow rate of 60µl per minute.

273

## 274 qPCR for transcriptional regulation during dark adaptation (DA)

275 Cells were cultured and harvested in the same experimental regime (described above) and  
276 harvested in biological triplicate at the times indicated for the LD and DA experiments. Total  
277 RNA was extracted from frozen cells using an RNeasy Plant Mini Kit and DNase treated  
278 (QIAGEN, Manchester, UK). First-strand cDNA was synthesised using 1 µg RNA and 500  
279 ng µl<sup>-1</sup> Oligo(dT)<sub>15</sub> primer (Promega, Southampton, UK), denatured at 65°C for 5 min, and  
280 reverse transcribed using SuperScript II (Invitrogen, now Thermo Fisher Scientific,  
281 Loughborough, UK) at 42 °C for 50 min and 70 °C for 10 min. 1/100 cDNA dilutions were  
282 analysed using a LightCycler<sup>®</sup>480 and LightCycler<sup>®</sup>480 SYBR Green I Master (Roche,

283 Welwyn Garden City, UK) following manufacturer's instructions and cycling conditions of  
284 pre-incubation 95°C for 5 min; 45x amplification cycles of 95°C for 10 s, 60°C for 10 s,  
285 72°C for 10 s. The following 5' to 3' forward (F) and reverse (R) primers to *O. tauri* gene  
286 loci were used: ostta01g01560 GTTGCCATCAACGGTTTCGG (F),  
287 GATTGGTTCACGCACACGAC (R); ostta03g00220 AAGGCTGGTTTGGCACAGAT (F),  
288 GCGCTTGCTCGACGTTAAC (R); ostta03g04500 GCCGCGGAAGATTCTTTCAAG (F),  
289 TCATCCGCCGTGATGTTGTG (R); ostta04g02740 ATCACCTGAACGATCGTGCG (F),  
290 CCGACTTACCCTCCTTAAGCG (R); ostta10g02780 GGCGTTCTTGGAATCTCTCGT  
291 (F), TATCGTCGATGATCCCGCCC (R); ostta10g03200 GGTACGGAGGAAGAAGTGGC  
292 (F), ATGTCCATGAGCTTCGGCAA (R); ostta14g00065 GACAGCCGGTGGATCAGAAG  
293 (F), TCGAGGTAGCTCGGGAGATC (R); ostta16g01620 ACGGGTTGCAGCTCATCTAC  
294 (F), CCGCTTGGGTCCAGTACTTC (R); ostta18g01250 CTTGCAAATGTCCACGACGG  
295 (F), ATGATGTGGCACGTCTACC (R); OtCpg00010 ACATGACTCACGCGCCTTAA  
296 (F), TGCCAAAGGTGCCCTACAAA (R). Primers to eukaryotic translation  
297 elongation/initiation factor (EF1a) ostta04g05410 GACGCGACGGTGGATCAA (F) and  
298 CGACTGCCATCGTTTTACC (R) were used as an endogenous control. Data were  
299 combined for biological and two technical replicates and relative quantification performed  
300 using LightCycler<sup>®</sup>480 1.5 software (Roche).

301

#### 302 HPLC–MS analysis

303 Micro-HPLC-MS/MS analyses were performed using an on-line system consisting of a  
304 micro-pump 1200 binary HPLC system (Agilent Technologies) coupled to an hybrid LTQ-  
305 Orbitrap XL instrument (Thermo Fisher Scientific). The complete method has been described  
306 previously (Le Bihan *et al.*, 2010). For all measurements, 8µl of sample was injected using a  
307 micro-WPS auto sampler (Agilent Technologies) at 5µl /min. After sample loading, the flow  
308 rate across the column was reduced to approximately 100-200 nl/min using a vented column  
309 arrangement. Samples were analysed on a 140 min gradient for data dependant analysis.

310

#### 311 HPLC-MS data analysis

312 To generate files compatible with public access databases PRIDE (Vizcaino *et al.*, 2016) and  
313 the former pep2pro (Hirsch-Hoffmann *et al.*, 2012), Mascot Generic Format (MGF) input  
314 files were generated using MSConvert from ProteoWizard (Kessner *et al.*, 2008). MSMS data  
315 was searched using MASCOT version 2.4 (Matrix Science Ltd, London, UK) against the *O.*  
316 *tauri* subset of the NCBI protein database (10114 sequences from NCBI version 2014 June  
317 6th including common contaminants) using a maximum missed-cut value of 2, variable  
318 oxidation (M), N-terminal protein acetylation, phosphorylation (STY) and fixed  
319 carbamidomethylation (C); precursor mass tolerance was 7 ppm and MSMS tolerance 0.4  
320 amu. The significance threshold (p) was set below 0.05 (MudPIT scoring). Global FDR was  
321 evaluated using decoy database search and removal of peptides ranked higher than 1 for a  
322 mascot score above 20 (~1% global FDR). Mass spectrometry proteomics data have been  
323 deposited in PRIDE ProteomeXchange Consortium (Vizcaino *et al.*, 2014) via the PRIDE  
324 partner repository with the dataset identifier LD global proteomics, PXD001735; LD  
325 phosphoproteomics, PXD001734; DA global proteomics, PXD002909. Data was converted  
326 into PRIDEXML using Pride converter 2.0.20 and submitted using proteome exchange tool  
327 pxsubmission tool 2.0.1. The LC-MS data were also publicly available in the former pep2pro  
328 database (Assemblies 'Ostreococcus tauri Light:dark cycle,LD global', 'Ostreococcus tauri  
329 Light:dark cycle,LD phospho', and 'Ostreococcus tauri dark adaptation,DA global').  
330 Label-free quantification was performed using Progenesis version 4.1 (Nonlinear Dynamics,  
331 Newcastle, UK). Only MS peaks with a charge of 2+, 3+ or 4+ and the five most intense



332 spectra within each feature were included in the analysis. Peptide abundances were mean-  
333 normalised and ArcSinH transformed to generate normal datasets. Within-group means were  
334 calculated to determine fold changes. Neutral losses of phosphoric acid typical of serine and  
335 threonine phosphorylated were validated manually in all significantly differential  
336 phosphopeptides. Ambiguous sites were confirmed by cross-referencing (by sequence,  
337 charge, and quantity of residue modifications) with most probable site predictions from  
338 MaxQuant version 1.0.13.8 (Cox and Mann, 2008) in singlet mode, Mascot settings as above.  
339 Where multiple occurrences of residue phosphorylation events were quantified, abundances  
340 were summed, collating all charge states, missed cuts and further modifications.

341

## 342 Data analysis

### 343 Merging

344 For accurate and unique phosphopeptide quantification we addressed variant redundancy at  
345 different charge states, alternative modifications (e.g. oxidation and acetylation) and multiple  
346 sites of protease digestion. All unique phosphorylation events were retained, including  
347 multiple phosphorylation, at a given amino acid motif, while summing the quantification of  
348 these technical variants. The qpMerge (<http://sourceforge.net/projects/ppmerge/>) software  
349 was used to combine Progenesis and MaxQuant phospho-site predictions and produce a  
350 unique set of quantified phosphopeptide motifs (Hindle *et al.*, 2016).

### 351 Outlier identification and removal

352 To detect outliers we applied principal component analysis (PCA) of replicates and  
353 comparing each replicates  $r^2$  to the respective median abundance at that ZT. A single  
354 replicate, 4E, was excluded based on extreme differences in peptide quantification as viewed  
355 in the wider distribution of the ratios to the sample median, which was confirmed with a  
356 Pearson's correlation against a defined criterion of a sample median of  $< 0.8$  (Supplementary  
357 Figures S1).

### 358 P-value calculation and false discovery rate (FDR)

359 For analysing the significance of changing protein and peptide abundance over time, non-  
360 linear response of expression using polynomial regression was modelled using the R Stats  
361 Package. A third order polynomial was fitted, allowing for an expected peak and trough  
362 within a 24 h daily cycle. An arcsinh transformation of abundance was applied to meet the  
363 required assumption of normality (Burbidge *et al.*, 1988). FDR was calculated using the  
364 Benjamini and Hochberg (BH) method (Benjamini and Hochberg, 1995). More than 2  
365 quantifying peptides were required to report protein abundance.

### 366 Equivalence testing

367 Using the R equivalence package, the statistical equivalence of mean abundance across time  
368 was tested as the highest  $p$ -value from exhaustive pairwise Two one-sided test approach  
369 (TOST) tests over all ZTs (Schuirmann, 1981; Westlake, 1981). We tested whether  
370 abundances had upper and lower differences of less than 0.3 within the equivalence margin  
371 ( $\epsilon$ ).

### 372 O. tauri gene identifiers

373 *O. tauri* genome version 1 gene IDs (Derelle *et al.*, 2006) for microarray data were converted  
374 to version 2 IDs (Blanc-Mathieu *et al.*, 2014) by finding exact sequence matches for the  
375 microarray probes (Accession GPL8644) (Monnier *et al.*, 2010) in the version 2 FASTA  
376 coding sequence file.

### 377 Principle component analysis (PCA)

378 PCA was used to investigate the main components of variation in the data using prcomp from  
379 the R Stats Package. The abundances were zero-centred per-feature. The PCA values for each  
380 feature were extracted and then used for Gene Ontology (GO) enrichment analysis.

## 381 **Clustering**

382 Hierarchical clustering was performed with hclust from the R Stats Package and applied on  
383 per-feature (protein or phosphopeptide motif) mean abundances over time, which were zero-  
384 centred and scaled. Pearson's correlation was used to calculate distance matrix and the Ward  
385 method (Ward, 1963) for linkage criteria. The hierarchical tree was divided into clusters  
386 using the dynamicTreeCut algorithm (Langfelder *et al.*, 2008). The hybrid cut tree method  
387 with a cut height of 100 and a minimum cluster size of 20 was used for both datasets.  
388 Clusters are displayed with 95% (black lines) and 99% (orange lines) confidence via  
389 multiscale bootstrap resampling (AU determined p-value).

## 390 **Enrichment analysis for GO terms**

391 TopGO was used to evaluate the enrichment of GO terms, for each ontology aspect, within  
392 clusters, peaks, troughs, and principal components. For clusters, peaks and troughs a Fisher's  
393 exact test was used by partitioning at 95% confidence on FDR corrected *p*-values, and with a  
394 fold change >1.5 in normalised abundance. For each test, we use a relevant background of  
395 non-significant observed features. To test for enrichment of GO terms for each PCA the  
396 Kolmogorov-Smirnov test was applied over the absolute PCA values for each gene. GO  
397 terms were predicted by InterProScan 5 (Jones *et al.*, 2014) on amino acids sequences for *O.*  
398 *tauri* coding sequences (NCBI version 140606 (Blanc-Mathieu *et al.*, 2014)).

## 399 **Homology modelling**

400 Structural homology models were generated using I-TASSER (Yang and Zhang, 2015) for  
401 prasinophyte-family specific proteins of unknown structure and function, including for  
402 ostta02g03680 compared to the human Bar-domain protein structure in PDB entry with DOI  
403 10.2210/pdb2d4c/pdb. Other suggested homologies were more limited.

## 404 **pLOGO and binomial statistics**

405 Significantly over- and under-represented amino acid residues at different time-points were  
406 calculated using the binomial based pLogo tool (O'Shea *et al.*, 2013). The Motif-X tool  
407 (Chou and Schwartz, 2011) was used to discover novel motifs in the dataset. Binomial  
408 statistics were applied to calculate the enrichment of motifs and the combined probabilities of  
409 amino acids with similar properties in a phospho-motif (*e.g.* the acidic D/E positions in the  
410 CK2 motif).

## 411 **Kinase target prediction**

412 Computational prediction of protein kinase motifs associated with the identified  
413 phosphorylation sites was performed using Group-based Prediction System, GPS Version 3.0  
414 (<http://gps.biocuckoo.org/index.php>) (Xue *et al.*, 2011).

## 415 ***O. tauri* loci IDs mapping to *A. thaliana* loci IDs**

416 *O. tauri* and *A. thaliana* IDs were mapped using EggNOG4.1 (<http://eggnogdb.embl.de>). *O.*  
417 *tauri* proteins were downloaded from  
418 [https://bioinformatics.psb.ugent.be/gdb/ostreococcusV2/LATEST/OsttaV2\\_PROT\\_20140522](https://bioinformatics.psb.ugent.be/gdb/ostreococcusV2/LATEST/OsttaV2_PROT_20140522)  
419 .fasta.gz (May 22<sup>nd</sup>, 2014). Viridiplantae (virNOG) hmms and their descriptions and  
420 annotations were transferred to *O. tauri* proteins using hmmer 3.1 (<http://hmmer.janelia.org>)  
421

## 422 **Mathematical simulations**

### 423 **Simulated protein rhythms**

424 Protein dynamics ( $P(t)$ ) were simulated according to the following model:

$$425 \quad \frac{dP(t)}{dt} = \left( (k_{syn} - 1)L + 1 \right) m(t) - k_{deg}P(t)$$

426 Where  $L(t) = 1$  during the day ( $ZT \leq 12$ ), and 0 otherwise. The rate of protein degradation  
427 ( $k_{deg}$ ) was set to  $0.1 \text{ h}^{-1}$ , and the ratio of protein synthesis in the light compared to the dark  
428 ( $k_{syn}$ ) was set to 4, based on (Martin *et al.*, 2012). The rhythmically expressed mRNA levels  
429 ( $m(t)$ ) are given by:

430 
$$m(t) = \cos\left(\frac{2\pi(t - \varphi)}{24}\right) + 1$$

431 The peak phase of expression is given by  $\varphi$ . To obtain the distributions of peak and trough  
432 protein levels, the peak phases ( $\varphi$ ) of mRNA expression were uniformly distributed at 0.1 h  
433 intervals across the range [0,24]. For each phase of mRNA expression, the timing of peak and  
434 trough protein levels was determined by simulating the model dynamics in MATLAB using  
435 the ode15s ODE solver. The peaks and troughs were identified across a 24 h period,  
436 following 240 h simulation to allow the dynamics to reach a steady behaviour (i.e. with the  
437 same protein levels at ZT0 and ZT24).

#### 438 **Protein degradation rates and depletion during dark adaptation**

439 Degradation rates were calculated from published proteomics data (Martin *et al.*, 2012),  
440 which characterised the dynamics of partial <sup>15</sup>N isotope incorporation. We assumed a  
441 labelling efficiency of 0.93 (=maximum labelled fraction achieved of any protein + 0.01), and  
442 fitted a simple kinetic model assuming: (1) constant labelling efficiency over time; (2)  
443 different proteins are labelled at the same efficiency; (3) heavy and light fractions are turned  
444 over at equal rates, similar to (Seaton *et al.*, 2018). One protein with a high degradation rate  
445 ~0.03 h<sup>-1</sup> was excluded as an outlier, which increased the correlation from R = -0.48 to -0.7  
446 when included.

447

## 448 **Results**

449

450 To understand the landscape of protein abundance and phosphorylation across the diel cycle,  
451 we harvested quintuplicate biological samples of *O. tauri* at six timepoints across a 12 h  
452 light/12 h dark (LD) cycle. Dawn samples (zeitgeber time 0, ZT0) were harvested just before  
453 lights-on, and samples at ZT12 before lights-off, to detect biological regulation that  
454 anticipated these transitions. The proteome and phosphoproteome were measured in whole-  
455 cell extracts from each sample, by label-free, liquid chromatography–mass spectrometry  
456 (Figure 1A). After removing a technical outlier (Supplementary Fig. S1), 855 proteins were  
457 quantified with 2 or more peptides (Supplementary Table S1). Phosphopeptides were  
458 enriched by metal-affinity chromatography prior to detection. For quantification, we  
459 combined the phosphopeptide species that shared phosphorylation on a particular amino acid,  
460 irrespective of other modifications (Hindle *et al.*, 2016). We refer to this set of  
461 phosphorylated species as a phosphopeptide motif (PM). 1472 phosphopeptide motifs were  
462 quantified, from 860 proteins (Supplementary Table 2). Serine and threonine residues were  
463 modified most; only 1% of PMs included phospho-tyrosine. The quantified proteins and  
464 phosphoproteins each represent ~11% of the total *O. tauri* proteome (Figure 1B). 29 out of 61  
465 proteins encoded on the chloroplast genome (Robbens *et al.*, 2007) were quantified, with 6  
466 PMs. 3 out of 43 mitochondrial-encoded proteins were quantified with no PMs, consistent  
467 with other studies (Ito *et al.*, 2009).

468

### 469 **Diel rhythmicity of the transcriptome, proteome and phosphoproteome**

470 To compare the patterns and prevalence of daily rhythms at different regulatory levels, we re-  
471 analysed published transcriptome data in parallel with these protein and phosphoprotein data,  
472 summarised in Figure 1C. Gene expression in *O. tauri* was strongly rhythmic under LD  
473 cycles, with 89% of transcripts scored rhythmic, as previously reported (Monnier *et al.*,  
474 2010). 85 (9.5%) of the detected proteins were significantly rhythmic and changed by at least  
475 1.5-fold, with only 11 of these proteins changing level by more than 5-fold. In contrast, 66%

476 of phosphoproteins or 58% of PMs (570 of 860 proteins; 850 of 1472 PMs) were rhythmic by  
477 these criteria and the levels of 35 PMs changed more than 20-fold. The overlap among all  
478 three datasets included only 110 genes. The most common pairwise overlaps involved genes  
479 with changing levels of RNA and/or PMs but not of protein (Figure 1C).

480

481 Protein levels nonetheless changed smoothly, with distinct waveforms. Of the twenty most  
482 highly-detected proteins, likely including the most abundant, 11 were significantly rhythmic  
483 but with low amplitudes (Supplementary Figure S2A), such that only *ostta10g03200*  
484 exceeded the 1.5-fold change threshold (Table S1). 15 of the twenty most highly-detected  
485 PMs, in contrast, were rhythmic by both criteria (Supplementary Figure S2B). The more  
486 stringent, “equivalence” test revealed 49 proteins with significantly non-changing protein  
487 abundance but with significantly changing transcript and PMs, illustrated by the 10-fold  
488 change in PM abundance on the non-changing, chlorophyll-binding protein CP26, amongst  
489 others (Supplementary Figure S3).

490

491 To address our major question on the dominant patterns of regulation, we used undirected,  
492 principal component (PC) analysis (Fig. 1D-1I). Clustering (Fig. 1D-1I, Supplementary  
493 Figure S4) and analysis of peak distributions (Fig. 2A-C) informed more detailed hypotheses  
494 on upstream regulation and downstream, functional effects. The PC analysis represented most  
495 (83-86%) of the variance in the data sets but indicated a differing balance of molecular  
496 regulation (Supplementary Table S3). The transcriptome and phosphoproteome data clearly  
497 separated between dawn and dusk timepoints (in PC1), whereas the light and dark intervals  
498 were separated by the secondary PC2. This mapped the 13 transcriptome and 6  
499 phosphoproteome timepoints into their respective, temporal sequences. Gene Ontology (GO)  
500 terms relating to translation, ribosome biogenesis and RNA processing were enriched among  
501 dawn-expressed RNAs, and mitotic processes (DNA replication and repair) among dusk-  
502 expressed transcripts (Supplementary Table S3), similar to past analysis (Monnier *et al.*,  
503 2010). The functions of rhythmic phosphoproteins are discussed in more detail, below.

504

505 The regulation was strikingly reversed in the proteome (Fig. 1C, 1D), where the major  
506 separation (in PC1) was between samples from light and dark intervals. The early day (ZT4),  
507 when translation and chlorophyll biosynthesis GO terms were enriched, was separated from  
508 all other timepoints, most strongly from mid-night (ZT16 and 20). There was less separation  
509 (in PC2) of the late night (ZT0), when proteins involved in the TCA cycle and transport  
510 processes are prominent, from the late day (ZT8-12), when translation and chlorophyll  
511 biosynthesis were still enriched. In contrast, the ZT0 timepoint stood out in the  
512 phosphoproteome (Fig. 1E, 1F), when PMs enriched for transcription, glucose metabolism,  
513 K<sup>+</sup> and protein transport and ubiquitin-dependent proteolysis functions were clearly separated  
514 from the late-day timepoints (ZT8, ZT12). PC2 separated mid-day timepoints (ZT4, ZT8,  
515 with enrichment for regulation of gene expression, translation and transmembrane transport)  
516 from mid-night (ZT16, ZT20, when mitosis and Ca<sup>2+</sup> transmembrane transport terms were  
517 enriched).

518

519 The even distribution of changing RNAs across all the transcriptomic timepoints was not  
520 reflected either in the proteome or the phosphoproteome data, where the early day (ZT4) or  
521 pre-dawn (ZT0) timepoints, respectively, stood out in the PC analysis. Hierarchical clustering  
522 grouped the protein and PM abundance profiles into 8 clusters (termed P1–P8 and PM1–  
523 PM8, respectively; Supplementary Figure S2C, S2D), which are coloured on the PC plots in  
524 Fig. 1F-1I. GO term enrichment for RNAs, proteins and PMs in the principal component,  
525 clustering and peak time analyses is presented in Supplementary Tables S3-S5, with a



526 summary for proteins and PMs in Supplementary Figure S5. We analysed the distribution of  
527 individual peak times (Figure 3) to understand these patterns, starting with the proteins.

528

### 529 Daytime peaks of protein abundance

530 Hundreds of transcripts reach peak abundance at every timepoint around the day/night cycle  
531 (Fig. 3A) (Monnier *et al.*, 2010). In contrast, most protein profiles peaked in the light interval  
532 (85% at ZT4-12; Fig. 2B), separating the day and night samples in line with the PC analysis.  
533 Metabolic labelling of *O. tauri* has shown ~5-fold higher protein synthesis rates in the day  
534 compared to the night (Martin *et al.*, 2012). Consistent with this, our analyses showed  
535 translation-related proteins were enriched among the rhythmic proteins with high abundance  
536 in the daytime, in PC1, protein cluster P1 and in profiles with daytime peak phase  
537 (Supplementary Tables S3-S5, Supplementary Figures S4, S5). We therefore tested whether  
538 this light-regulated synthesis alone could explain the observed distribution of protein peaks.

539

540 We simulated protein dynamics (Fig. 2D-2F; Supplementary Figure S6) using measured  
541 protein synthesis and degradation rates (Martin *et al.*, 2012), and an even temporal  
542 distribution of rhythmic mRNAs. The simulated distribution of protein profiles matched well  
543 with our experimental results (Fig. 2E; Supplementary Figures S6D-S6G), with a slightly  
544 stronger daytime preference than in the data. *ostta03g04520* is an example of an RNA that  
545 peaks at ZT0 and its protein profile (Fig. 2G) was very similar to the predicted protein from  
546 such an RNA (Fig. 2D). The overall distribution of protein profiles substantially reflects the  
547 light-stimulated translation rate of this organism (see Discussion).

548

### 549 Unusual, night-time proteins suggest a ‘dark state’

550 An intriguing pattern of protein regulation stood out from the common, daytime abundance.  
551 Protein cluster P6 (and P8) included the rare protein profiles that fell at ZT4 (Supplementary  
552 Figure S2C), associated with oxidative metabolism and protein transport GO terms  
553 (Supplementary Table S4). Four un-annotated, prasinophyte-specific proteins in cluster P6  
554 not only peaked at night, but were also among the 11, highest-amplitude profiles of all the  
555 rhythmic proteins (Fig. 3A). Their dramatic fall in abundance at ZT4 suggested a  
556 destabilisation by light, so we tested whether such proteins would remain stable during  
557 several days of dark-adaptation (DA).

558

559 *O. tauri* cells are photo-autotrophic. Their division is entrained by the LD cycle (Farinas *et al.*  
560 *et al.*, 2006) and they arrest transcription in prolonged darkness, when they can survive without  
561 growth or division (O’Neill *et al.*, 2011). Cell density (optical density at 600nm) in our  
562 cultures increased by ~25% after one LD cycle. Cellular protein content was consistent (18-  
563 20 pg cell<sup>-1</sup>) in replicate measures at ZT0 and ZT24 (Fig. 3B). In cultures transferred to three  
564 further days of darkness, optical density remained constant but protein content per cell  
565 dropped by over 60% on the first day (ZT24 to ZT48) and was then stable to ZT96. This  
566 result was suggestive of an altered, but potentially stable, cellular ‘dark state’, which we  
567 tested in a further, proteomic timeseries, sampling in darkness at ZT24, 48, 72 and 96.

568

569 The proteomic landscape changed less during dark adaptation (DA) than under a standard LD  
570 cycle. 98 of the 865 proteins quantified by LC-MS changed levels more than the average and  
571 only 64 (7%) also changed more than 1.5-fold (Supplementary Table S6). The 35  
572 significantly-increasing proteins in DA included five transmembrane transporters, a Lon-  
573 related protease and two superoxide dismutases, suggestive of nutrient acquisition, protein  
574 mobilisation and oxidative stress responses. The four prasinophyte-specific proteins noted



575 above were among the ten most-increasing proteins in DA, confirming their unusual  
576 regulation and suggesting a shared function in both standard night-time and the putative ‘dark  
577 state’. The most-decreasing among 63 significantly-decreasing proteins in DA was a starch  
578 synthase (ostta06g02940). Its abundance declined in the night under LD cycles, as did all 10  
579 of the DA-decreasing proteins that were also rhythmic in LD. The largest functional group of  
580 depleted proteins comprised 22 cytosolic ribosomal proteins and translation factors  
581 (Supplementary Table S6), suggesting that *O. tauri* selectively mobilised this protein pool in  
582 darkness.

583

584 The night-abundant, prasinophyte proteins that accumulated in DA, and night-depleted  
585 proteins that fell in DA (such as ostta06g02940, above; or PPDK ostta02g04360,  
586 Supplementary Figure S7C), suggested that prolonged darkness preserved a night-like state.  
587 An alternative explanation was that protein stability in general was altered in the putative  
588 dark state. We sought to test that notion, using the protein degradation rates that were  
589 previously measured by metabolic labelling in LD conditions (Martin *et al.*, 2012). Falling  
590 protein abundance under DA was significantly correlated with higher degradation rates in LD  
591 (Fig. 3C;  $R = -0.48$ ,  $p=0.004$ ,  $n=34$ ), even among these abundant, stable proteins. We also  
592 tested RNA abundance for a subset of these proteins in DA by qRT-PCR, showing stable  
593 levels after one day of prolonged darkness (ZT48; Supplementary Figure S8A). The lack of  
594 RNA regulation seemed consistent with the lack of transcription in these conditions (O’Neill  
595 *et al.*, 2011). For example, a further prasinophyte-specific protein ostta03g4500 with a stable  
596 RNA level and slightly-increasing protein level in DA also had among the lowest protein  
597 degradation rates in LD (Fig. 3C), and was among the most-detected proteins in these  
598 conditions (Supplementary Figures S2A, S8B). The RNA data and protein degradation rates  
599 suggested that the prasinophyte-specific proteins accumulated due to a focussed, regulatory  
600 mechanism, rather than generalised refactoring of the proteome (see Discussion).

601

## 602 A phospho-dawn of protein modification

603 In contrast to the many daytime-peaking protein profiles, 39% of the changing  
604 phosphopeptide motifs (PMs) peaked in abundance at ZT0 (Fig. 2C), double the proportion  
605 of any other timepoint. The ZT0 samples were harvested before lights-on, so this ‘phospho-  
606 dawn’ anticipated the transition and was not due to light-stimulated translation. Other, high-  
607 amplitude PM profiles tracked the levels of their cognate proteins, with little evidence of  
608 regulated phosphorylation (Fig. 2G). We therefore tested the contribution of protein levels to  
609 PM profiles more broadly, among the 138 genes that were quantified in both protein and PM  
610 datasets (Supplementary Figures S7A-B). This subset of 261 protein-PM pairings included  
611 proteins peaking at all timepoints, and PM profiles that reflected the peak time distribution of  
612 the full dataset. 80% of the PMs peaked at different timepoints than their cognate protein  
613 (Supplementary Figure S7C; examples in Fig. 2H). The LHC linker protein CP29  
614 (ostta01g04940) illustrates one pattern: its protein level rises in the light while a PM is de-  
615 phosphorylated (Supplementary Figure S7C) adjacent to a target site of chloroplast kinase  
616 STN7 in *Arabidopsis* (Schönberg *et al.*, 2017).

617 To test the phospho-dawn pattern by a different method, we estimated the bulk protein  
618 phosphorylation across the diel cycle using protein gel staining (Supplementary Figures S9A-  
619 B). The proportion of phosphorylated proteins was lowest in the daytime and increased  
620 during the night to peak at ZT0 (Supplementary Figures S9C). Total phosphorylation was  
621 therefore broadly consistent with the distribution of PM profiles (Fig. 2C). Taken together,  
622 these results indicate that a regulator other than light or protein abundance controls the *O.*

623 *tauri* phosphoproteome before dawn. Below, we report phosphosite sequences that suggested  
624 its identity.

### 625 Functions of proteins with rhythmic phospho-motifs

626 The LD datasets confirmed that protein phosphorylation profiles often diverged from protein  
627 abundance. Colour-coding in Fig. 1H shows that clustering of the phospho-motif (PM)  
628 profiles aligned with the PC analysis more clearly than for the lower-amplitude, protein  
629 profiles (Fig. 1F). The largest cluster PM1 reflected the profiles that peaked in the ZT0  
630 timepoint, which PC analysis also highlighted (Supporting Figure S2D). Phosphopeptide  
631 enrichment allowed the detection of many regulatory proteins, including PMs on predicted  
632 CONSTANS-like B-box transcription factors (OtCOL) related to the plant clock protein  
633 TOC1 (Fig. 4), and on the RWP-RK mating-type factor ostta02g04300 (Blanc-Mathieu *et al.*,  
634 2017). PM1 also includes the predicted CK2 target site pS10 in the clock protein CCA1  
635 (ostta06g02340; Fig. 4), close to the homologous location of a CK2 site in Arabidopsis  
636 CCA1 (Lu *et al.*, 2011).

637  
638 PMs in cluster PM3 peaked in the light, consistent with many protein profiles (examples in  
639 Fig. 2G). PMs on the photoreceptors phototropin and LOV-HK illustrate these daytime  
640 profiles (Fig. 4). Protein functions predicted to regulate transcription, metal ion transport and  
641 protein phosphorylation are enriched in this cluster (summarised in Supplementary Figure  
642 S2F; Supplementary Table S4) and in profiles with daytime peaks (Supplementary Figure  
643 S4B; Supplementary Table S5).

644  
645 In contrast, the PM2, PM4, PM7 and PM8 clusters peaked at ZT16, with or without  
646 accumulation in daytime (Supplementary Figure S2D). These clusters are enriched for PMs  
647 on protein kinases including cell-cycle-related kinases (Supplementary Figures S2F, S4B;  
648 Supplementary Tables S4 and S5). We therefore analysed the phospho-regulators that might  
649 control these profiles, including potential contributions to non-transcriptional timing.

650

### 651 Phase-specific target sites

652 We first analysed motifs of amino acids that were enriched in rhythmic PMs, compared with  
653 all quantified phosphopeptides to avoid potential detection bias due to PM abundance. PMs  
654 that peaked at ZT16 were strikingly enriched for the proline-directed motif [pS/pT]P (Fig.  
655 5B-C). This strongly implicates the CMGC family of protein kinases, including Cyclin-  
656 Dependent Kinases (CDKs) and GSK. Consistent with this, the profiles of PMs with  
657 predicted GSK target sequences also most often peaked at ZT16 (Supplementary Figure  
658 S10A-B). Levels of *GSK3* RNA and a PM on *GSK3* peaked at ZT12 (Fig. 4), though the  
659 auto-phosphorylation site pY210 was not rhythmic (Supplementary Fig. S2B; Supplementary  
660 Table S2). More specific CDK target motifs [pS/pT]PXX[K/R] were enriched at ZT12,  
661 consistent with the known timing of cell division (Farinas *et al.*, 2006; Moulager *et al.*, 2007)  
662 and the peak level of the activation phospho-site of CDKB (Fig. 4). During the day (ZT4 and  
663 8), enrichment of hydrophobic residues at positions -5 and +4 is suggestive of the SnRK  
664 consensus (Vlad *et al.*, 2008), the plant kinase most related to animal AMPK.

665 In contrast, acid([D/E])-directed target motifs were significantly enriched among the many  
666 rhythmic PMs that peaked at ZT0 and the proline-directed motifs were depleted (Fig. 5C).  
667 Conversely, these acid-directed motifs were depleted on PMs peaking at ZT16 or ZT4,  
668 suggesting a strong phase-specificity. Considering the more specific, predicted target sites for  
669 the clock-related protein kinases (Supplementary Figures S10A), predicted CK1 targets were  
670 most abundant, and most often peaked at ZT0. Predicted CK2 target sequences were even

671 more phase-specific, with at least 5-fold more peaking at ZT0 than at other times. Thus  
672 predicted targets of the clock-related kinases CK1 and CK2 both contribute to the phospho-  
673 dawn profiles, in antiphase to the evening peaks of proline-directed phospho-sites.

#### 674 Rhythmic regulation of the kinome

675 The protein abundance of the three detected protein kinases and two phosphatases was not  
676 rhythmic (Supplementary Table S1). We therefore analysed the 68 rhythmic PMs on protein  
677 kinases and five PMs on protein phosphatases, as candidate mediators of rhythmic  
678 phosphorylation (Figs. 5A, 5D). The PMs on kinases represent 8% of the total, though protein  
679 kinase genes comprise ~1.5% of the genome. Indeed, the most heavily-phosphorylated  
680 protein with 14 PMs was the WITH NO LYSINE (WNK) kinase that might target clock  
681 proteins in Arabidopsis (Murakami-Kojima *et al.*, 2002) (Supplementary Table S2;  
682 Supplementary Figure S10C). The most-changing PM on a predicted protein phosphatase was  
683 pT175 in *ostta1lg02830*, related to human Dual-specificity phosphatase DUSP12 (Fig. 5D).

684 Among the clock-related protein kinases, we note the dusk-peaking PM of GSK3 (above).  
685 CK2 subunits were not detected in our data and the PM on CK1 was not strongly rhythmic  
686 (Fig. 4). 21 other protein kinases bore rhythmic PMs that are predicted targets of these clock-  
687 related kinases (Supplementary Figures S10C).

688 Around mitosis at ZT12-16, significantly peaking PMs were detected on cell cycle regulators  
689 CDKA, CDKB and WEE1 (Fig. 5D). Kinase PMs peaking at ZT4-8 included Serine-  
690 Arginine Protein Kinases (SRPKs), MAPKs, CDKA and a site on Yet Another Kinase  
691 (YAK1). PMs that peaked at ZT0, coincident with the phospho-dawn, included RIO2, YAK1  
692 and CDPK, all implicated in cell cycle regulation and progression (Garrett *et al.*, 1991;  
693 LaRonde-LeBlanc and Wlodawer, 2005). RIO's are among the few kinase families shared  
694 with the Archaea (Kennelly, 2014), making them candidate contributors to an ancient, non-  
695 transcriptional oscillator (Edgar *et al.*, 2012).

## 696 Discussion

### 697 The diel proteome and phosphoproteome

698 Our results contribute to understand the 'reactive' and 'anticipatory' components of protein  
699 regulation in the green lineage under diel (LD) cycles (Mehta *et al.*, 2021). A small fraction  
700 of the *O. tauri* proteins quantified here were rhythmic (just under 10%), compared to a  
701 majority (58%) of the phosphomotifs (PMs). Most protein profiles peaked in daytime,  
702 consistent with the 'reactive' effect predicted from the light-regulated translation that was  
703 previously measured in this organism (Martin *et al.*, 2012), and with enrichment of  
704 translation-related functions among daytime-peaking proteins. This result reinforces the  
705 dangers of using RNA profiles as a proxy for biological function. It further supports our  
706 prediction that "translational coincidence" should alter the *O. tauri* proteome in different day  
707 lengths, as some rhythmic RNAs will coincide with light-stimulated translation only in long  
708 days (Seaton *et al.*, 2018).

709  
710 In contrast, the largest number of PM profiles peaked in the pre-dawn, ZT0 timepoint. This  
711 anticipatory 'phospho-dawn' might be controlled by the circadian clock. Circadian regulation  
712 would be expected to persist under constant conditions, which were not tested here. Studies in  
713 Arabidopsis under constant light, however, identified a high fraction of rhythmic  
714 phosphopeptides that peaked at subjective dawn (Choudhary *et al.*, 2015)(Krahmer *et al.*,  
715 2018), suggesting a similar, circadian-regulated phospho-dawn in higher plants. Such

716 phospho-regulation might prepare green cells for daytime functions and/or end night-time  
717 activities, before light-stimulated translation facilitates new protein synthesis.

718 Acid-directed target sites were clearly enriched at ZT0, implicating the clock-related kinases  
719 CK1 and CK2 in regulating the phospho-dawn in *O. tauri*. Enrichment of proline-directed  
720 target sites occurs in antiphase, at ZT12-16, which implicates the 19 CMGC-class kinase  
721 proteins (Hindle *et al.*, 2014) including CDKs, MAPKs and GSK3. These phase-specific  
722 enrichments were clearer than in the Arabidopsis studies, suggesting that the minimal kinase-  
723 target network of *O. tauri* might be easier to resolve in future. Comparison to the rhythmic  
724 phosphoproteome in animals is limited, because the most-rhythmic kinase Akt (also known  
725 as Protein Kinase B) in mouse liver (Robles *et al.*, 2016) is absent from the green lineage  
726 (Hindle *et al.*, 2014).

727 The low overall rhythmicity (<10%) in the partial proteome quantified here is consistent with  
728 similar studies in Arabidopsis, which identified 0.1-1.5% rhythmic proteins from 7-9 % of the  
729 proteome in LD, using iTRAQ labelling with similar statistical criteria to ours (Baerenfaller  
730 *et al.*, 2015; Baerenfaller *et al.*, 2012), or 4-7% rhythmic proteins from 4% of the proteome  
731 under constant light using a gel-based approach (Choudhary *et al.*, 2016). Our results provide  
732 11% coverage in the minimal *O. tauri* proteome, with a simpler experimental protocol.  
733 Broader coverage of this proteome was reported after our preprint was released (Kay *et al.*,  
734 2021), in experiments that included a depletion of abundant proteins, among several technical  
735 differences. Their higher reported fraction of rhythmic proteins might reflect the detection of  
736 low-abundance proteins and/or analysis with no minimum amplitude threshold.

737

### 738 [The 'dark state' is indirectly associated with lipid synthesis](#)

739 Among the rhythmic proteins reported here, some of the most highly-regulated were four  
740 prasinophyte-specific sequences (unnamed proteins ostta02g03680, ostta03g04960,  
741 ostta07g00470, ostta09g00670; Figure 3A) along with ostta03g04500 (Supplementary Figure  
742 S2A). These proteins accumulated further in prolonged darkness (Figure 3A). We previously  
743 showed that *O. tauri* stop transcription and cell division in those conditions. Cultures resume  
744 gene expression and growth upon return to LD cycles, suggesting that dark adaptation  
745 induces a state of cellular quiescence. The ecological relevance of a quiescent 'dark state' for  
746 photo-autotrophic, surface-dwelling *O. tauri* is not immediately obvious. However,  
747 *Ostreococcus* relatives can persist under the Polar Night (Joli *et al.*, 2017), and quiescent  
748 forms in other phytoplankton (Roy *et al.*, 2014) can be ecologically important in benthic-  
749 pelagic coupling (Marcus and Boero, 1998). Cells near the deep chlorophyll maximum  
750 (Cardol *et al.*, 2008) could be moved into the dark, benthic zone by turbulence, to return later  
751 via upwelling (Collado-Fabbri *et al.*, 2011; Countway and Caron, 2006). Understanding the  
752 laboratory 'dark state' might therefore have ecological relevance.

753 Protein content dropped significantly between 12h and 36h of darkness (ZT24 to ZT48) but  
754 was then stable. Proteins associated with cytosolic translation were notably depleted  
755 (Supplementary Table 6), rather than abundant, chloroplast proteins involved in  
756 photosynthesis. Photosynthetic functions might be particularly important to recover from  
757 quiescence, similar to the rapid regrowth observed after nutrient starvation (Liefer *et al.*,  
758 2018).

759 A preprint coincident with our first report showed that three of these night-expressed,  
760 prasinophyte-specific proteins accumulated strongly in *O. tauri* when the growth medium  
761 was depleted of nitrogen, under LD cycles (Smallwood *et al.*, 2018a). The most-depleted  
762 protein in their conditions was the same starch synthase (ostta06g02940) that fell most in



763 abundance under our prolonged dark treatment. Nitrogen depletion is commonly used to  
764 induce lipid synthesis in algae, in the context of third-generation biofuel production  
765 (Zienkiewicz *et al.*, 2016). Prolonged darkness and/or hypoxia can also induce lipid  
766 accumulation, and hypoxia can occur in dark-adapting algal cultures due to continued  
767 respiration (Hemschemeier *et al.*, 2013). Our culture conditions included sorbitol and  
768 glycerol in the growth medium (O'Neill *et al.*, 2011), which are required for viability in  
769 prolonged darkness. Our 'dark state' proteome might therefore reflect active lipid synthesis  
770 from these substrates.

771 *O. tauri* can form both intracellular lipid droplets and extracellular droplets in membrane-  
772 bound 'pea-pod' structures (Smallwood *et al.*, 2018b). Lipid droplets in other algae include  
773 major proteins that are restricted to limited taxonomic groups (Zienkiewicz *et al.*, 2016).  
774 Some of these are predicted to have all-alpha-helical structure, including the Major Lipid  
775 Droplet Protein Cre09.g405500 of *Chlamydomonas reinhardtii* or the Lipid Droplet Surface  
776 Protein of the diatom *Nannochloropsis oceanica*. Protein structure homology modelling  
777 aligned oस्ता02g03680 with a human BAR domain dimer, an all-helical protein domain that  
778 can sense and create membrane curvature (Simunovic *et al.*, 2015)(Supplementary Figure  
779 S11), suggesting that this *O. tauri* protein might also be involved in lipid droplets. *N.*  
780 *oceanica* lipid synthesis and LDSP accumulation is highly rhythmic but day-phased (Poliner  
781 *et al.*, 2015). The night-expressed proteins in *O. tauri* indirectly suggest a different regulation  
782 of lipid synthesis, that could have biotechnological relevance.

## 783 [Supplementary Data Summary](#)

784 **Supplementary Figure S1. Identification of outlier phosphopeptide replicate 4E.**

785

786 **Supplementary Figure S2. Most-detected protein and PM profiles.**

787

788 **Supplementary Figure S3. Changing PMs on non-changing proteins.**

789

790 **Supplementary Figure S4. Clustered protein and PM profiles with enriched functions.**

791

792 **Supplementary Figure S5. Phase-specific GO term enrichment.**

793

794 **Supplementary Figure S6. Simulation of light-regulated translation.**

795

796 **Supplementary Figure S7. Loci identified in both LD protein and phosphopeptide motif  
797 datasets.**

798

799 **Supplementary Figure S8. Regulation of proteins tested under Dark Adaptation (DA).**

800

801 **Supplementary Figure S9. Protein and phospho-protein abundance in LD cycle.**

802

803 **Supplementary Figure S10. CK1, CK2 and GSK3 kinase targets and phosphorylation sites in  
804 rhythmic kinases.**

805

806 **Supplementary Figure S11. Structural homology of rhythmic, prasinophyte-specific protein.**

807

808 ---

809

810 **Supplementary Table S1. Proteins quantified under LD.**

811



812 **Supplementary Table S2. Phosphopeptide Motifs (PMs) quantified under LD.**

813

814 **Supplementary Table S3. GO term enrichment among RNA, proteins and PMs contributing to**  
815 **PCA.**

816

817 **Supplementary Table S4. GO term enrichment among RNA, proteins and PMs in clusters.**

818 Individually-significant, rhythmic protein profiles are considered, to provide sufficient numbers for  
819 enrichment analysis. Only BH-corrected significant PM profiles with >1.5-fold changes are  
820 considered.

821

822 **Supplementary Table S5. GO term enrichment among rhythmic proteins and PMs by**

823 **peak/trough times.** Only BH-corrected significant protein or PM profiles with >1.5-fold changes are  
824 considered.

825

826 **Supplementary Table S6. Proteins quantified under DA.**

827

828 **Acknowledgements**

829 We are very grateful to K. Kis, L. Imrie and D. Kelly for expert technical help, to B. Kolody  
830 and A. Dodd for helpful discussion, to M. Hirsch-Hoffmann and K. Baerenfaller for support  
831 on pep2pro, and to C.R. Smallwood, J.E. Evans and colleagues for clarifying the comparison  
832 to their work. The proteomics analyses were carried out by the EdinOmics research facility  
833 (RRID: SCR\_021838) at the University of Edinburgh. Funded by the Biotechnology and  
834 Biological Sciences Research Council (UKRI-BBSRC award BB/J009423/1). For the  
835 purpose of open access, the author has applied a Creative Commons Attribution (CC BY)  
836 licence to any Author Accepted Manuscript version arising from this submission.

837 **Author Contributions**

838 Z.B.N. and M.M.H. contributed equally to this study. Investigation and formal analysis,  
839 Z.B.N., S.F.M. and T.L.B.; formal analysis (bioinformatics), M.M.H.; formal analysis  
840 (mathematical modelling), D.D.S.; conceptualisation and methodology, A.J.M., T.I.S.,  
841 T.L.B., S.F.M., M.M.H. and Z.B.N.; funding acquisition and supervision, A.J.M., T.I.S. and  
842 T.L.B.; writing, Z.B.N., M.M.H., T.L.B. and A.J.M.

843 **Conflicts of Interest**

844 The authors declare no competing financial interests.

845 **Data Availability**

846 The OTTH95 strain is available from the CCAP ([www.ccap.ac.uk](http://www.ccap.ac.uk)) and RCC ([roscoff-culture-](http://roscoff-culture-collection.org)  
847 [collection.org](http://roscoff-culture-collection.org)) stock centres. Mass spectrometry proteomics data have been deposited in the  
848 ProteomeXchange Consortium via the PRIDE partner repository with the dataset identifiers:  
849 LD global proteomics, PXD001735; LD phosphoproteomics, PXD001734; DA global  
850 proteomics, PXD002909. The LC-MS data were also previously available in pep2pro at  
851 [www.pep2pro.ethz.ch](http://www.pep2pro.ethz.ch) (Assemblies 'Ostreococcus tauri Light:dark cycle,LD global',  
852 'Ostreococcus tauri Light:dark cycle,LD phospho', 'Ostreococcus tauri dark adaptation,DA  
853 global'). Processed data lists are provided in the Supplementary Information.

854

855 **REFERENCES**

856

857 **Baerenfaller K, Massonnet C, Hennig L, Russenberger D, Sulpice R, Walsh S, Stitt M, Granier C,**  
858 **Gruissem W.** 2015. A long photoperiod relaxes energy management in Arabidopsis leaf six. *Current*  
859 *Plant Biology* **2**, 34–45.

860 **Baerenfaller K, Massonnet C, Walsh S, et al.** 2012. Systems-based analysis of Arabidopsis leaf  
861 growth reveals adaptation to water deficit. *Molecular Systems Biology* **8**, 606.

862 **Baginsky S, Gruissem W.** 2009. The chloroplast kinase network: new insights from large-scale  
863 phosphoproteome profiling. *Molecular Plant* **2**, 1141–53.

864 **Benjamini Y, Hochberg Y.** 1995. Controlling the False Discovery Rate: A Practical and Powerful  
865 Approach to Multiple Testing. *Journal of the Royal Statistical Society: Series B (Methodological)* **57**,  
866 289–300.

867 **Blanc-Mathieu R, Verhelst B, Derelle E, et al.** 2014. An improved genome of the model marine alga  
868 *Ostreococcus tauri* unfolds by assessing Illumina de novo assemblies. *BMC Genomics* **15**, 1103.

869 **Blasing OE, Gibon Y, Gunther M, Hohne M, Morcuende R, Osuna D, Thimm O, Usadel B, Scheible**  
870 **WR, Stitt M.** 2005. Sugars and circadian regulation make major contributions to the global regulation  
871 of diurnal gene expression in Arabidopsis. *The Plant Cell* **17**, 3257–81.

872 **Boex-Fontvieille E, Davanture M, Jossier M, Zivy M, Hodges M, Tcherkez G.** 2014. Photosynthetic  
873 activity influences cellulose biosynthesis and phosphorylation of proteins involved therein in  
874 Arabidopsis leaves. *Journal of Experimental Botany* **65**, 4997–5010.

875 **Bouget FY, Lefranc M, Thommen Q, Pfeuty B, Lozano JC, Schatt P, Botebol H, Verge V.** 2014.  
876 Transcriptional versus non-transcriptional clocks: a case study in *Ostreococcus*. *Mar Genomics* **14**,  
877 17–22.

878 **Breitkreutz A, Choi H, Sharom JR, et al.** 2010. A global protein kinase and phosphatase interaction  
879 network in yeast. *Science* **328**, 1043–6.

880 **Champion A, Kreis M, Mockaitis K, Picaud A, Henry Y.** 2004. Arabidopsis kinome: after the casting.  
881 *Funct Integr Genomics* **4**, 163–87.

882 **Chou MF, Schwartz D.** 2011. Biological sequence motif discovery using motif-x. *Curr Protoc*  
883 *Bioinformatics* **Chapter 13**, Unit 13 15-24.

884 **Choudhary MK, Nomura Y, Shi H, Nakagami H, Somers DE.** 2016. Circadian Profiling of the  
885 Arabidopsis Proteome Using 2D-DIGE. *Frontiers in Plant Science* **7**, 1007.

886 **Choudhary MK, Nomura Y, Wang L, Nakagami H, Somers DE.** 2015. Quantitative Circadian  
887 Phosphoproteomic Analysis of Arabidopsis Reveals Extensive Clock Control of Key Components in  
888 Physiological, Metabolic, and Signaling Pathways\*. *Molecular & Cellular Proteomics* **14**, 2243–2260.

- 889 **Christie JM.** 2007. Phototropin blue-light receptors. *Annual Review of Plant Biology* **58**, 21–45.
- 890 **Corellou F, Schwartz C, Motta J-P, Djouani-Tahri EB, Sanchez F, Bouget F-Y.** 2009. Clocks in the  
891 Green Lineage: Comparative Functional Analysis of the Circadian Architecture of the Picoeukaryote  
892 *Ostreococcus*. *The Plant Cell* **21**, 3436–3449.
- 893 **Courties C, Vaquer A, Troussellier M, Lautier J, Chrétiennot-Dinet MJ, Neveux J, Machado C,**  
894 **Claustre H.** 1994. Smallest eukaryotic organism. *Nature* **370**, 255–255.
- 895 **Cox J, Mann M.** 2008. MaxQuant enables high peptide identification rates, individualized p.p.b.-  
896 range mass accuracies and proteome-wide protein quantification. *Nat Biotechnol* **26**, 1367–72.
- 897 **Creux N, Harmer S.** 2019. Circadian Rhythms in Plants. *Cold Spring Harbor Perspectives in Biology* **11**,  
898 a034611.
- 899 **Derelle E, Ferraz C, Rombauts S, et al.** 2006. Genome analysis of the smallest free-living eukaryote  
900 *Ostreococcus tauri* unveils many unique features. *Proceedings of the National Academy of Sciences*  
901 *of the U S A* **103**, 11647–52.
- 902 **Djouani-Tahri el B, Christie JM, Sanchez-Ferandin S, Sanchez F, Bouget FY, Corellou F.** 2011*a*. A  
903 eukaryotic LOV-histidine kinase with circadian clock function in the picoalga *Ostreococcus*. *Plant*  
904 *Journal* **65**, 578–88.
- 905 **Djouani-Tahri el B, Sanchez F, Lozano JC, Bouget FY.** 2011*b*. A phosphate-regulated promoter for  
906 fine-tuned and reversible overexpression in *Ostreococcus*: application to circadian clock functional  
907 analysis. *PLoS ONE* **6**, e28471.
- 908 **Doherty MK, Hammond DE, Clague MJ, Gaskell SJ, Beynon RJ.** 2009. Turnover of the Human  
909 Proteome: Determination of Protein Intracellular Stability by Dynamic SILAC. *Journal of Proteome*  
910 *Research* **8**, 104–112.
- 911 **Dunlap JC, Loros JJ.** 2017. Making Time: Conservation of Biological Clocks from Fungi to Animals.  
912 *Microbiol Spectr* **5**.
- 913 **Edgar RS, Green EW, Zhao Y, et al.** 2012. Peroxiredoxins are conserved markers of circadian  
914 rhythms. *Nature* **485**, 459–64.
- 915 **Farinas B, Mary C, Manes CLD, Bhaud Y, Peaucellier G, Moreau H.** 2006. Natural synchronisation for  
916 the study of cell division in the green unicellular alga *Ostreococcus tauri*. *Plant Molecular Biology* **60**,  
917 277–292.
- 918 **Feeney KA, Hansen LL, Putker M, Olivares-Yañez C, Day J, Eades LJ, Larrondo LF, Hoyle NP, O’Neill**  
919 **JS, van Ooijen G.** 2016. Daily magnesium fluxes regulate cellular timekeeping and energy balance.  
920 *Nature* **532**, 375–379.
- 921 **Garrett S, Menold MM, Broach JR.** 1991. The *Saccharomyces cerevisiae* YAK1 gene encodes a  
922 protein kinase that is induced by arrest early in the cell cycle. *Molecular and Cellular Biology* **11**,  
923 4045–4052.

- 924 **Hemschemeier A, Casero D, Liu B, Benning C, Pellegrini M, Happe T, Merchant SS.** 2013. COPPER  
925 RESPONSE REGULATOR1–Dependent and –Independent Responses of the *Chlamydomonas*  
926 *reinhardtii* Transcriptome to Dark Anoxia. *The Plant Cell* **25**, 3186–3211.
- 927 **Hindle MM, Le Bihan T, Krahmer J, Martin SF, Noordally ZB, Simpson TI, Millar AJ.** 2016. qpMerge:  
928 Merging different peptide isoforms using a motif centric strategy.
- 929 **Hindle MM, Martin SF, Noordally ZB, van Ooijen G, Barrios-Llerena ME, Simpson TI, Le Bihan T,**  
930 **Millar AJ.** 2014. The reduced kinome of *Ostreococcus tauri*: core eukaryotic signalling components in  
931 a tractable model species. *BMC Genomics* **15**, 640.
- 932 **Hirsch-Hoffmann M, Gruissem W, Baerenfaller K.** 2012. pep2pro: the high-throughput proteomics  
933 data processing, analysis, and visualization tool. *Frontiers in Plant Science* **3**, 123.
- 934 **Ishihara H, Obata T, Sulpice R, Fernie AR, Stitt M.** 2015. Quantifying protein synthesis and  
935 degradation in *Arabidopsis* by dynamic <sup>13</sup>CO<sub>2</sub> labeling and analysis of enrichment in individual  
936 amino acids in their free pools and in protein. *Plant Physiology* **168**, 74–93.
- 937 **Ito J, Taylor NL, Castleden I, Weckwerth W, Millar AH, Heazlewood JL.** 2009. A survey of the  
938 *Arabidopsis thaliana* mitochondrial phosphoproteome. *Proteomics* **9**, 4229–40.
- 939 **Jones P, Binns D, Chang HY, et al.** 2014. InterProScan 5: genome-scale protein function  
940 classification. *Bioinformatics* **30**, 1236–1240.
- 941 **Juntawong P, Bailey-Serres J.** 2012. Dynamic Light Regulation of Translation Status in *Arabidopsis*  
942 *thaliana*. *Frontiers in Plant Science* **3**, 66.
- 943 **Karr JR, Sanghvi JC, Macklin DN, Gutschow MV, Jacobs JM, Bolival B, Assad-Garcia N, Glass JI,**  
944 **Covert MW.** 2012. A whole-cell computational model predicts phenotype from genotype. *Cell* **150**,  
945 389–401.
- 946 **Kay H, Grunewald E, Feord HK, Gil S, Peak-Chew SY, Stangherlin A, O’Neill JS, van Ooijen G.** 2021.  
947 Deep-coverage spatiotemporal proteome of the picoeukaryote *Ostreococcus tauri* reveals  
948 differential effects of environmental and endogenous 24-hour rhythms. *Commun Biol* **4**, 1147.
- 949 **Kennelly PJ.** 2014. Protein Ser/Thr/Tyr phosphorylation in the Archaea. *Journal of Biological*  
950 *Chemistry* **289**, 9480–7.
- 951 **Kessner D, Chambers M, Burke R, Agus D, Mallick P.** 2008. ProteoWizard: open source software for  
952 rapid proteomics tools development. *Bioinformatics* **24**, 2534–6.
- 953 **Khoury GA, Baliban RC, Floudas CA.** 2011. Proteome-wide post-translational modification statistics:  
954 frequency analysis and curation of the swiss-prot database. *Scientific reports* **1**, 90.
- 955 **Kolody BC, McCrow JP, Allen LZ, et al.** 2019. Diel transcriptional response of a California Current  
956 plankton microbiome to light, low iron, and enduring viral infection. *ISME J* **13**, 2817–2833.
- 957 **Krahmer J, Hindle M, Perby LK, Mogensen HK, Nielsen TH, Halliday KJ, van Ooijen G, Le Bihan T,**  
958 **Millar AJ.** 2022. The Circadian Clock Gene Circuit Controls Protein and Phosphoprotein Rhythms in  
959 *Arabidopsis thaliana*. *Mol Cell Proteomics* **21**, 100172.

- 960 **Kusakina J, Dodd AN.** 2012. Phosphorylation in the plant circadian system. *Trends in Plant Science*  
961 **17**, 575–83.
- 962 **Laloum D, Robinson-Rechavi M.** 2022. Rhythmicity is linked to expression cost at the protein level  
963 but to expression precision at the mRNA level. *PLOS Computational Biology* **18**, e1010399.
- 964 **Langfelder P, Zhang B, Horvath S.** 2008. Defining clusters from a hierarchical cluster tree: the  
965 Dynamic Tree Cut package for R. *Bioinformatics* **24**, 719–720.
- 966 **LaRonde-LeBlanc N, Wlodawer A.** 2005. The RIO kinases: An atypical protein kinase family required  
967 for ribosome biogenesis and cell cycle progression. *Biochimica et Biophysica Acta (BBA) - Proteins*  
968 *and Proteomics* **1754**, 14–24.
- 969 **Le Bihan T, Hindle M, Martin SF, Barrios-Llerena ME, Krahmer J, Kis K, Millar AJ, van Ooijen G.**  
970 2015. Label-free quantitative analysis of the casein kinase 2-responsive phosphoproteome of the  
971 marine minimal model species *Ostreococcus tauri*. *Proteomics*.
- 972 **Le Bihan T, Martin SF, Chirnside ES, van Ooijen G, Barrios-Llerena ME, O'Neill JS, Shliaha PV, Kerr**  
973 **LE, Millar AJ.** 2011. Shotgun proteomic analysis of the unicellular alga *Ostreococcus tauri*. *J*  
974 *Proteomics* **74**, 2060–70.
- 975 **Li L, Nelson CJ, Trosch J, Castleden I, Huang S, Millar AH.** 2017. Protein Degradation Rate in  
976 *Arabidopsis thaliana* Leaf Growth and Development. *The Plant Cell* **29**, 207–228.
- 977 **Lu SX, Liu H, Knowles SM, Li J, Ma L, Tobin EM, Lin C.** 2011. A role for protein kinase casein kinase2  
978 alpha-subunits in the *Arabidopsis* circadian clock. *Plant Physiology* **157**, 1537–45.
- 979 **Manning G, Whyte DB, Martinez R, Hunter T, Sudarsanam S.** 2002. The protein kinase complement  
980 of the human genome. *Science* **298**, 1912–34.
- 981 **Martin SF, Munagapati VS, Salvo-Chirnside E, Kerr LE, Le Bihan T.** 2012. Proteome Turnover in the  
982 Green Alga *Ostreococcus tauri* by Time Course (15)N Metabolic Labeling Mass Spectrometry. *J*  
983 *Proteome Res* **11**, 476–86.
- 984 **Mehra A, Baker CL, Loros JJ, Dunlap JC.** 2009. Post-translational modifications in circadian rhythms.  
985 *Trends Biochem Sci* **34**, 483–90.
- 986 **Mehta D, Krahmer J, Uhrig RG.** 2021. Closing the protein gap in plant chronobiology. *The Plant*  
987 *Journal*.
- 988 **Michael TP, Mockler TC, Breton G, et al.** 2008. Network discovery pipeline elucidates conserved  
989 time-of-day-specific cis-regulatory modules. *PLoS Genet* **4**, e14.
- 990 **Millar AJ.** 2016. The intracellular dynamics of circadian clocks reach for the light of ecology and  
991 evolution. *Annual Review of Plant Biology* **67**, 595–618.
- 992 **Missra A, Ernest B, Lohoff T, Jia Q, Satterlee J, Ke K, von Arnim AG.** 2015. The Circadian Clock  
993 Modulates Global Daily Cycles of mRNA Ribosome Loading. *The Plant Cell* **27**, 2582–2599.



- 994 **Monnier A, Liverani S, Bouvet R, Jesson B, Smith JQ, Mosser J, Corellou F, Bouget FY.** 2010.  
995 Orchestrated transcription of biological processes in the marine picoeukaryote *Ostreococcus*  
996 exposed to light/dark cycles. *BMC Genomics* **11**, 192.
- 997 **Moulager M, Monnier A, Jesson B, Bouvet R, Mosser J, Schwartz C, Garnier L, Corellou F, Bouget**  
998 **FY.** 2007. Light-dependent regulation of cell division in *Ostreococcus*: evidence for a major  
999 transcriptional input. *Plant Physiology* **144**, 1360–9.
- 1000 **Noordally ZB, Millar AJ.** 2015. Clocks in algae. *Biochemistry* **54**, 171–83.
- 1001 **Ocone A, Millar AJ, Sanguinetti G.** 2013. Hybrid regulatory models: a statistically tractable approach  
1002 to model regulatory network dynamics. *Bioinformatics* **29**, 910–6.
- 1003 **O’Neill JS, van Ooijen G, Dixon LE, Troein C, Corellou F, Bouget FY, Reddy AB, Millar AJ.** 2011.  
1004 Circadian rhythms persist without transcription in a eukaryote. *Nature* **469**, 554–8.
- 1005 **van Ooijen G, Dixon LE, Troein C, Millar AJ.** 2011. Proteasome Function Is Required for Biological  
1006 Timing throughout the Twenty-Four Hour Cycle. *Current Biology* **21**, 869–875.
- 1007 **van Ooijen G, Hindle M, Martin SF, Barrios-Llerena M, Sanchez F, Bouget FY, O’Neill JS, Le Bihan T,**  
1008 **Millar AJ.** 2013. Functional analysis of Casein Kinase 1 in a minimal circadian system. *PLoS ONE* **8**,  
1009 e70021.
- 1010 **van Ooijen G, Knox K, Kis K, Bouget FY, Millar AJ.** 2012. Genomic transformation of the  
1011 picoeukaryote *Ostreococcus tauri*. *J Vis Exp*, e4074.
- 1012 **van Ooijen G, Millar AJ.** 2012. Non-transcriptional oscillators in circadian timekeeping. *Trends*  
1013 *Biochem Sci* **37**, 484–92.
- 1014 **O’Shea JP, Chou MF, Quader SA, Ryan JK, Church GM, Schwartz D.** 2013. pLogo: a probabilistic  
1015 approach to visualizing sequence motifs. *Nature Methods* **10**, 1211–1212.
- 1016 **Paajanen P, Lane de Barros Dantas L, Dodd AN.** 2021. Layers of crosstalk between circadian  
1017 regulation and environmental signalling in plants. *Current Biology* **31**, R399–R413.
- 1018 **Pal SK, Liput M, Piques M, et al.** 2013. Diurnal changes of polysome loading track sucrose content in  
1019 the rosette of wild-type *Arabidopsis* and the starchless *pgm* mutant. *Plant Physiology* **162**, 1246–65.
- 1020 **Piques M, Schulze WX, Hohne M, Usadel B, Gibon Y, Rohwer J, Stitt M.** 2009. Ribosome and  
1021 transcript copy numbers, polysome occupancy and enzyme dynamics in *Arabidopsis*. *Molecular*  
1022 *Systems Biology* **5**, 314.
- 1023 **Poliner E, Panchy N, Newton L, Wu G, Lapinsky A, Bullard B, Zienkiewicz A, Benning C, Shiu S-H,**  
1024 **Farré EM.** 2015. Transcriptional coordination of physiological responses in *Nannochloropsis oceanica*  
1025 CCMP1779 under light/dark cycles. *The Plant Journal* **83**, 1097–1113.
- 1026 **Robbens S, Derelle E, Ferraz C, Wuyts J, Moreau H, Van de Peer Y.** 2007. The complete chloroplast  
1027 and mitochondrial DNA sequence of *Ostreococcus tauri*: organelle genomes of the smallest  
1028 eukaryote are examples of compaction. *Mol Biol Evol* **24**, 956–68.

- 1029 **Schönberg A, Rödiger A, Mehwald W, Galonska J, Christ G, Helm S, Thieme D, Majovsky P,**  
1030 **Hoehenwarter W, Baginsky S.** 2017. Identification of STN7/STN8 kinase targets reveals connections  
1031 between electron transport, metabolism and gene expression. *The Plant Journal* **90**, 1176–1186.
- 1032 **Schuirmann DL.** 1981. On Hypothesis-Testing to Determine If the Mean of a Normal-Distribution Is  
1033 Contained in a Known Interval. *Biometrics* **37**, 617–617.
- 1034 **Scott M, Gunderson CW, Mateescu EM, Zhang Z, Hwa T.** 2010. Interdependence of cell growth and  
1035 gene expression: origins and consequences. *Science* **330**, 1099–102.
- 1036 **Seaton DD, Graf A, Baerenfaller K, Stitt M, Millar AJ, Gruissem W.** 2018. Photoperiodic control of  
1037 the Arabidopsis proteome reveals a translational coincidence mechanism. *Molecular Systems*  
1038 *Biology* **14**, e7962.
- 1039 **Smallwood CR, Chen J-H, Kumar N, et al.** 2018a. Integrated systems biology and imaging of the  
1040 smallest free-living eukaryote *Ostreococcus tauri*. bioRxiv.
- 1041 **Smallwood CR, Chrisler W, Chen J-H, Patello E, Thomas M, Boudreau R, Ekman A, Wang H,**  
1042 **McDermott G, Evans JE.** 2018b. *Ostreococcus tauri* is a high-lipid content green algae that extrudes  
1043 clustered lipid droplets. bioRxiv.
- 1044 **Smith SM, Fulton DC, Chia T, Thorneycroft D, Chapple A, Dunstan H, Hylton C, Zeeman SC, Smith**  
1045 **AM.** 2004. Diurnal changes in the transcriptome encoding enzymes of starch metabolism provide  
1046 evidence for both transcriptional and posttranscriptional regulation of starch metabolism in  
1047 Arabidopsis leaves. *Plant Physiology* **136**, 2687–99.
- 1048 **Troein C, Corellou F, Dixon LE, van Ooijen G, O'Neill JS, Bouget F-Y, Millar AJ.** 2011. Multiple light  
1049 inputs to a simple clock circuit allow complex biological rhythms. *The Plant Journal* **66**, 375–385.
- 1050 **Turkina MV, Kargul J, Blanco-Rivero A, Villarejo A, Barber J, Vener AV.** 2006. Environmentally  
1051 modulated phosphoproteome of photosynthetic membranes in the green alga *Chlamydomonas*  
1052 *reinhardtii*. *Mol Cell Proteomics* **5**, 1412–25.
- 1053 **Uhrig RG, Echevarría-Zomeño S, Schlapfer P, Grossmann J, Roschitzki B, Koerber N, Fiorani F,**  
1054 **Gruissem W.** 2021. Diurnal dynamics of the Arabidopsis rosette proteome and phosphoproteome.  
1055 *Plant, Cell & Environment* **44**, 821–841.
- 1056 **Vizcaino JA, Csordas A, del-Toro N, et al.** 2016. 2016 update of the PRIDE database and its related  
1057 tools. *Nucleic Acids Research* **44**, D447-56.
- 1058 **Vizcaino JA, Deutsch EW, Wang R, et al.** 2014. ProteomeXchange provides globally coordinated  
1059 proteomics data submission and dissemination. *Nature Biotechnology* **32**, 223–6.
- 1060 **Vlad F, Turk BE, Peynot P, Leung J, Merlot S.** 2008. A versatile strategy to define the  
1061 phosphorylation preferences of plant protein kinases and screen for putative substrates. *The Plant*  
1062 *Journal* **55**, 104–117.
- 1063 **Ward JH.** 1963. Hierarchical Grouping to Optimize an Objective Function. *Journal of the American*  
1064 *Statistical Association* **58**, 236-.

- 1065 **Westlake WJ.** 1981. Bioequivalence Testing - a Need to Rethink - Reply. *Biometrics* **37**, 591–593.
- 1066 **Whitelam GC, Halliday KJ.** 2007. *Light and plant development*. Oxford ; Ames, Iowa: Blackwell Pub.
- 1067 **Wong DC, O’Neill JS.** 2018. Non-transcriptional processes in circadian rhythm generation. *Curr Opin*  
1068 *Physiol* **5**, 117–132.
- 1069 **Xue Y, Liu Z, Cao J, Ma Q, Gao X, Wang Q, Jin C, Zhou Y, Wen L, Ren J.** 2011. GPS 2.1: enhanced  
1070 prediction of kinase-specific phosphorylation sites with an algorithm of motif length selection.  
1071 *Protein Eng Des Sel* **24**, 255–60.
- 1072 **Yang J, Zhang Y.** 2015. Protein Structure and Function Prediction Using I-TASSER. *Curr Protoc*  
1073 *Bioinformatics* **52**, 5 8 1-15.
- 1074 **Zienkiewicz K, Du Z-Y, Ma W, Vollheyde K, Benning C.** 2016. Stress-induced neutral lipid  
1075 biosynthesis in microalgae — Molecular, cellular and physiological insights. *Biochimica et Biophysica*  
1076 *Acta (BBA) - Molecular and Cell Biology of Lipids* **1861**, 1269–1281.
- 1077

## 1078 FIGURE LEGENDS

1079 **Figure 1. Daily variation in transcripts, proteins, and phosphopeptide motifs.** (A) Workflow for  
1080 proteomics in *O. tauri* under LD. Overlap in (B) detected and quantified gene loci, (C) significantly  
1081 changing (solid circles) or not significantly-changing (dashed circles) loci for transcripts (Monnier *et*  
1082 *al.*, 2010), proteins and PMs; genomic loci excluded (square brackets). (D-I) Bi-plots of PCA for (D,  
1083 E) transcript, (F, G) protein and (H, I) phosphomotif profiles. Proportion of the variance for each PC  
1084 is indicated. Dot locations show the weighting of each RNA/protein/PM in each PC; colours show the  
1085 assigned cluster (as in Supplementary Figure S4).

1086  
1087 **Figure 2. Distribution of rhythmic protein and phosphopeptide motif peaks, with examples.**  
1088 Temporal distribution of peaking profiles in (A) transcripts, (B) proteins and (C) PMs. (D, F)  
1089 Simulated protein profiles from RNAs peaking at (D) ZT0 or (F) ZT16, with (red line) or without  
1090 light-regulated translation (black line). (E) predicted distribution of protein peak times, with light-  
1091 regulated translation. Examples of genes with (G) high-amplitude and similar protein (solid line) and  
1092 PM profiles (coloured lines), or (H) PM profiles that differ from the protein profile. (G, H) protein  
1093 and PM, left axis; RNA profile (dashed line), right axis. Error bars, S.E. Light/dark indicated by  
1094 white/black bars.

1095  
1096 **Figure 3. Regulation of dark-accumulating proteins.** Protein abundance profiles (A) of rhythmic  
1097 prasinophyte-specific proteins in cluster P6 in LD and DA conditions. (B) Optical density (OD600;  
1098 line, right axis) and total protein per cell (columns, left axis) under LD and DA conditions. (C)  
1099 Correlation of protein degradation rates (Martin *et al.*, 2012) and relative protein levels after DA;  
1100 chloroplast proteins (circles, chloroplast-encoded have solid outline); mitochondrial proteins  
1101 (triangles, mitochondria-encoded outlined); PLP-enzymes (squares, marked in legend); prasinophyte-  
1102 specific proteins (diamonds).

1103  
1104 **Figure 4. Protein and phosphopeptide motif regulation.**  
1105 Phosphomotif (coloured lines) and RNA profiles (Monnier *et al.*, 2010)(dashed lines) of the  
1106 photoreceptors, clock components, transcription factors and kinases indicated, under LD. Left axis  
1107 range  $2^6$  (64-fold) except OtCCA1 (PM changes 150-fold) and OtCOL2 (PMs change up to 20-fold).  
1108 Right (RNA) axis range 12, for log2 data ( $2^{12}=4096$ -fold in untransformed data). Error bars, S.E.  
1109 Light/dark indicated by white/black bars. PHOT, phototropin photoreceptor; LOV-HK, LOV domain  
1110 – histidine kinase photoreceptor; COL, CONSTANS-like transcription factor.

1111  
1112 **Figure 5. Motif enrichment and rhythmic protein kinases and phosphatases under LD.** (A)  
1113 Rhythmic PMs peaking at each timepoint on protein kinase (black) and phosphatase (grey) proteins  
1114 (numbers). (B) Enrichment of proline-directed motifs, for kinases shown in the legend (dashed line, *p*-  
1115 value = 0.05). (C) pLogo sequence motifs of rhythmic PMs peaking at each timepoint (foreground;  
1116 fg), relative to all detected phosphopeptides (background; bg).  $\pm 3.80$  indicates *p*-value = 0.05,  
1117 residues above and below axis are over- and under-represented, respectively. (D) Rhythmic PMs by  
1118 kinase/phosphatase family, annotated with example proteins.

1119

1120

1121 FIGURES

1122 Figure 1

1123

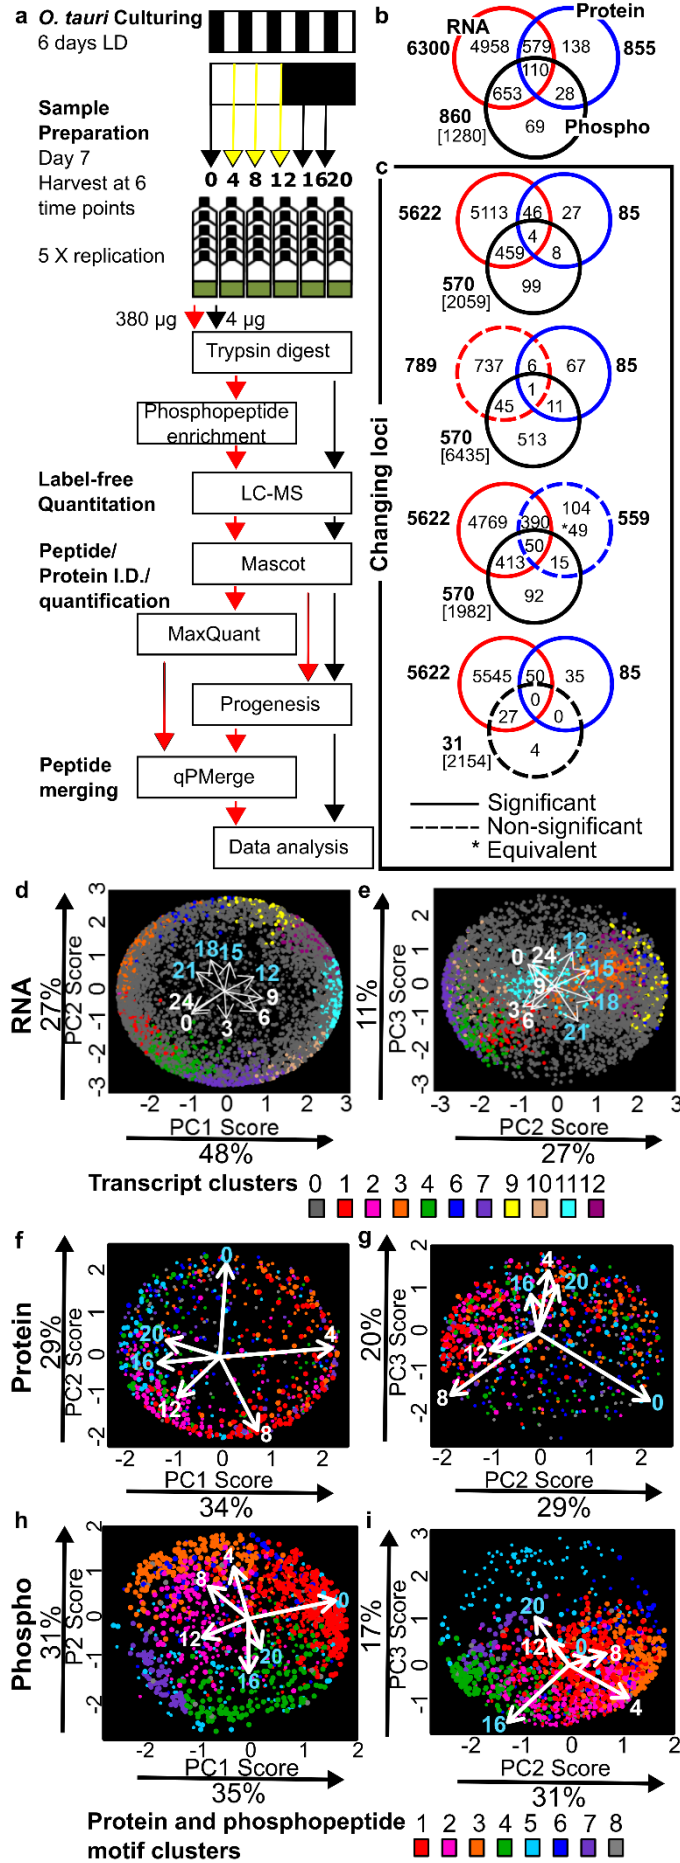



1124 **Figure 2**  
 1125  
 1126

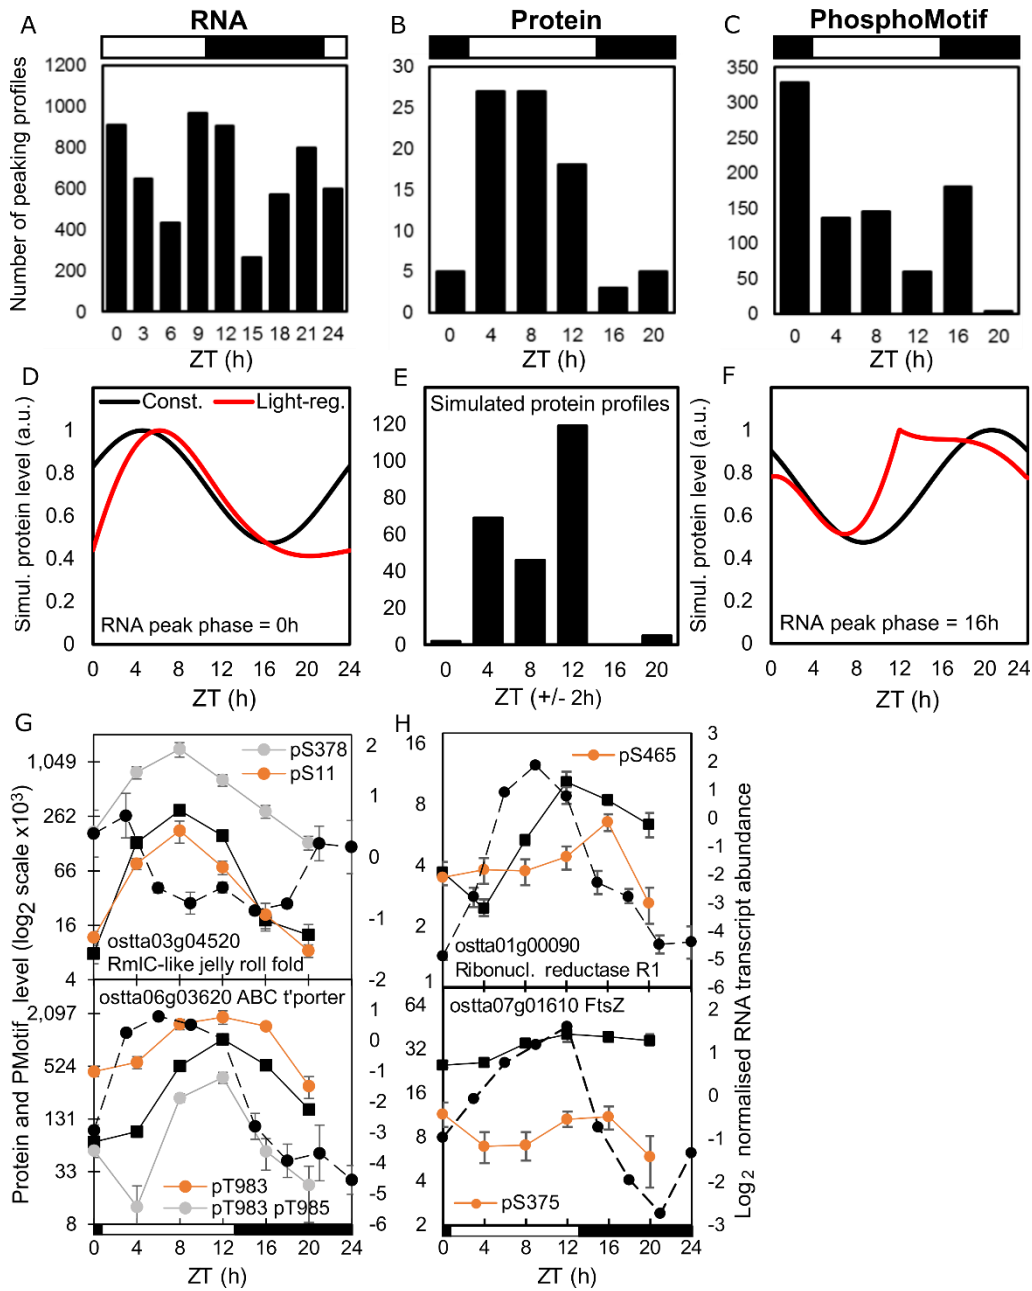

1127  
 1128  
 1129

1130  
1131  
1132

**Figure 3**

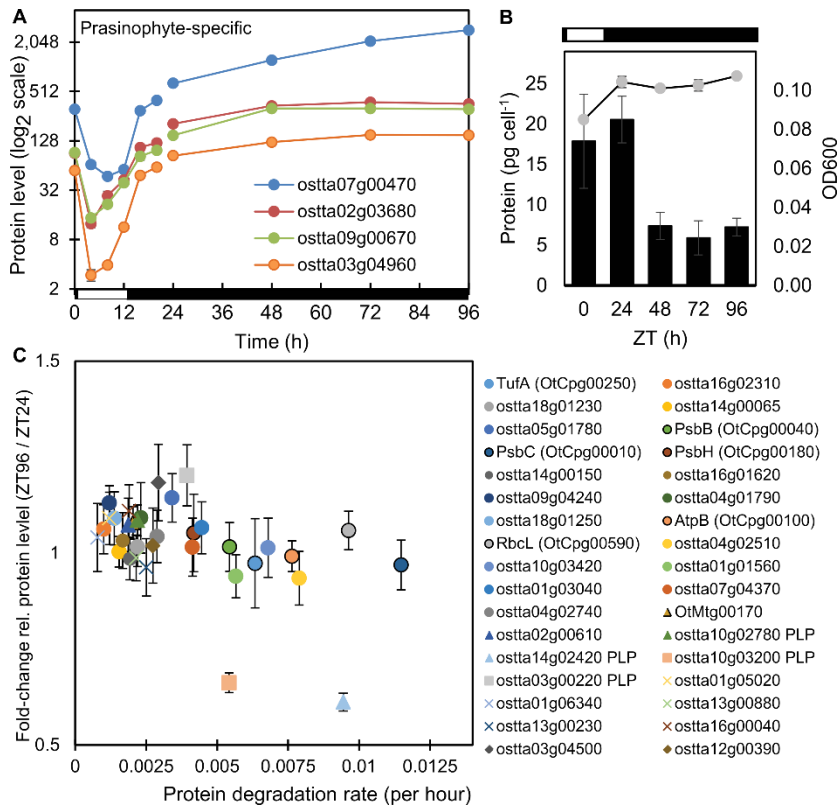

1133  
1134

1135 **Figure 4**

1136

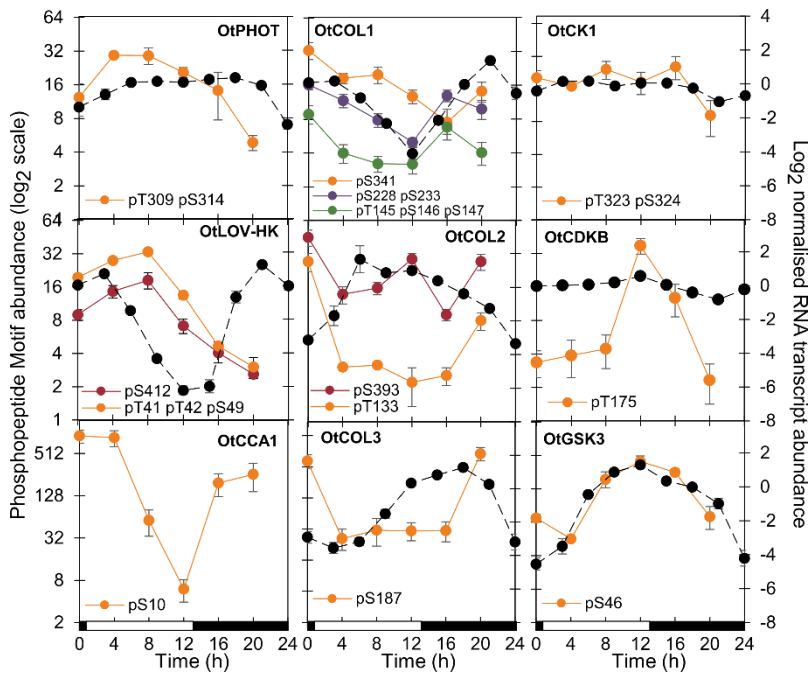

1137

1138

1139 **Figure 5**  
1140

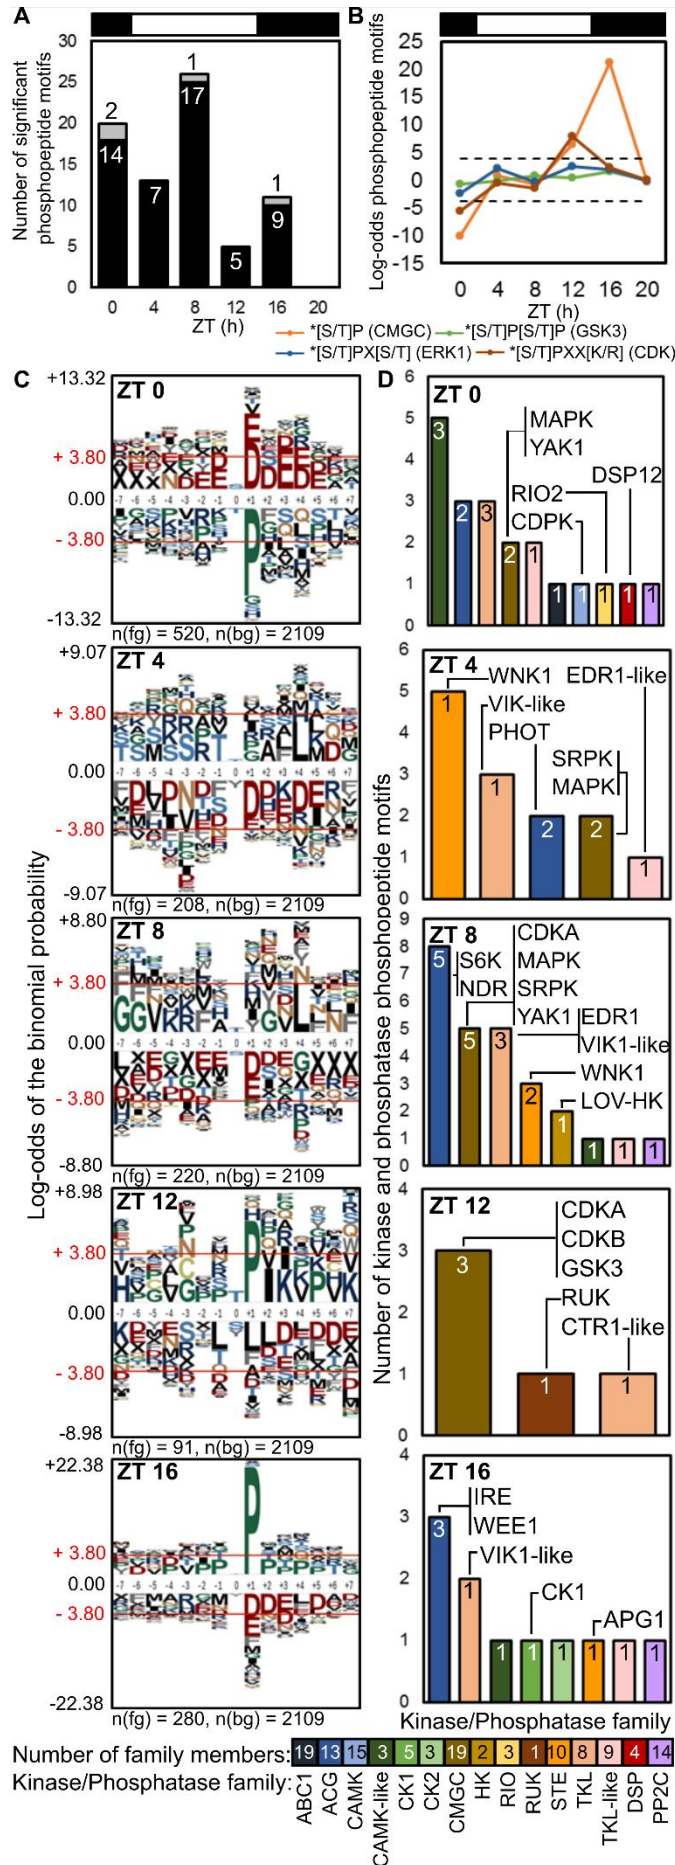

## 1141 Supplementary Figure Legends

1142

1143 **Supplementary Figure S1. Identification of outlier phosphopeptide replicate 4E.** Pearson's  
1144 correlation for (a) proteins and (b) phosphopeptide motifs and sample replicate  $r^2$  respective to median  
1145 abundance at a ZT for (c) proteins and (d) phosphopeptide motifs. Note differing scales in (a,b), (c,d).

1146

1147 **Supplementary Figure S2. Most-detected protein and PM profiles, with comprehensive heat  
1148 maps, clusters and enriched functions.** Highly-abundant proteins (a) and PMs (b) under LD  
1149 conditions (\* marks rhythmic PMs). Error bars, S.E. Light/dark indicated by white/black bars, above.

1150

1151 **Supplementary Figure S3. Changing PMs on non-changing proteins.** Significantly non-changing  
1152 proteins (black lines) determined by two one-sided tests (TOST;  $\epsilon = 0.3$ ), plotted with their rhythmic  
1153 phosphopeptide motifs  $\pm$  S.E., square brackets show phosphorylated residue. Light/dark indicated by  
1154 white/black bars.

1155

1156 **Supplementary Figure S4. Clustered protein and PM profiles with enriched functions.** Heat  
1157 maps of median-normalised (A) protein and (B) PM abundance, with insets top left showing the  
1158 distribution of levels and colour scale. Clusters P1-8 or PM1-8 are shown, colours in 'cluster' track  
1159 are as in Fig. 1; FDR track shows  $>1.5$  fold-change and BH FDR adjusted  $p$ -value  $<0.05$  (black line)  
1160 or  $<0.01$  (orange line); bars to right of each panel show the mean protein or PM abundance ( $\log_{10}$   
1161 scale). Light/dark indicated by white/black bars, above. (C, D) Examples of significantly-changing  
1162 proteins and PMs in each cluster (as noted in the main text).

1163

1164 **Supplementary Figure S5. GO enrichments for peaks and troughs.** GO Biological Process term  
1165 enrichment for rhythmic (a) proteins and (b) phosphopeptide motifs, that was significant (Fisher's  
1166 exact test  $p$ -value  $<0.05$ ) in profiles with peak (no shading) or trough (pink shading) time at each  
1167 timepoint. Light/dark indicated by white/black column. Grey bars represent proportion of significant  
1168 terms identified with respect to total number of background annotated terms.

1169

1170 **Supplementary Figure S6. Simulation of light-regulated translation.** (a-c) Simulation of protein  
1171 dynamics for an RNA with peak expression at ZT0 (a), ZT8 (b) and ZT16 (c), with observed, light-  
1172 regulated translation rate (red lines) or with constant translation rate (black lines). Distribution of  
1173 protein peaks (d,f) and troughs (e,g) for the model with light-regulated translation (d,e) compared to  
1174 data (f,g). Distributions for constant translation would reflect the distribution of RNA profiles.

1175

1176 **Supplementary Figure S7. Loci identified in both LD protein and phosphopeptide motif  
1177 datasets.** (a, b) Peak time is compared for genes identified in both LD protein and phosphopeptide  
1178 motif datasets, with examples (c). (a) Mixed phase: multiple PMs, peaking at same and different times  
1179 from cognate protein. Green shading in (b) follows number per bin. Plotting conventions in (c) follow  
1180 Fig. 2c, 2d.

1181

1182 **Supplementary Figure S8. Regulation of proteins tested under Dark Adaptation (DA).**  
1183 For ten proteins compared in the DA and metabolic labelling (Martin *et al.*, 2012) data (Fig. 4c), (a)  
1184 RNA abundance under LD and DA conditions from qRT-PCR assays, and (b) protein profiles under  
1185 LD. \*, rhythmic proteins. Error bar, S.E.

1186

1187 **Supplementary Figure S9. Protein and phospho-protein abundance in LD cycle.** Stained gels  
1188 showing changes in (a) protein and (b) phosphorylated protein abundance in LD, with (c) ratio of  
1189 quantified, phosphorylated protein to total protein intensity.

1190

1191 **Supplementary Figure S10. CK1, CK2 and GSK3 kinase targets and phosphorylation sites in  
1192 rhythmic kinases.** Distribution of GPS3-predicted CK1 (black), CK2 (red) and GSK3 (black) targets  
1193 among rhythmic phosphopeptide motifs, binned by peak (a) and trough (b) times. (c) Phosphosites on  
1194 rhythmic protein kinases predicted to be phosphorylated by CK1, CK2 and GSK3, site location labels



1195 coloured as in (a). \* sites first reported here; †‡ sites observed previously (van Ooijen *et al.*, 2013).  
1196 Protein kinase classes are coloured as in Figure 5.

1197

1198 **Supplementary Figure S11. Structural homology of a rhythmic prasinophyte-specific protein.**

1199 Structural homology models predicted using I-TASSER of (a) ostta02g03680 where the model is  
1200 overlaid with (b) *H. sapiens* BAR domain structure (2d4c). Model  $\alpha$ -helices (purple) and  $\beta$ -sheets  
1201 (green) are numbered in black on the *O. tauri* model and in blue where structure is conserved with  
1202 homologue protein overlay and in white where secondary structure is not conserved.

1203

1204 **Supplementary Figures**

1205 **Supplementary Figure S1**

1206

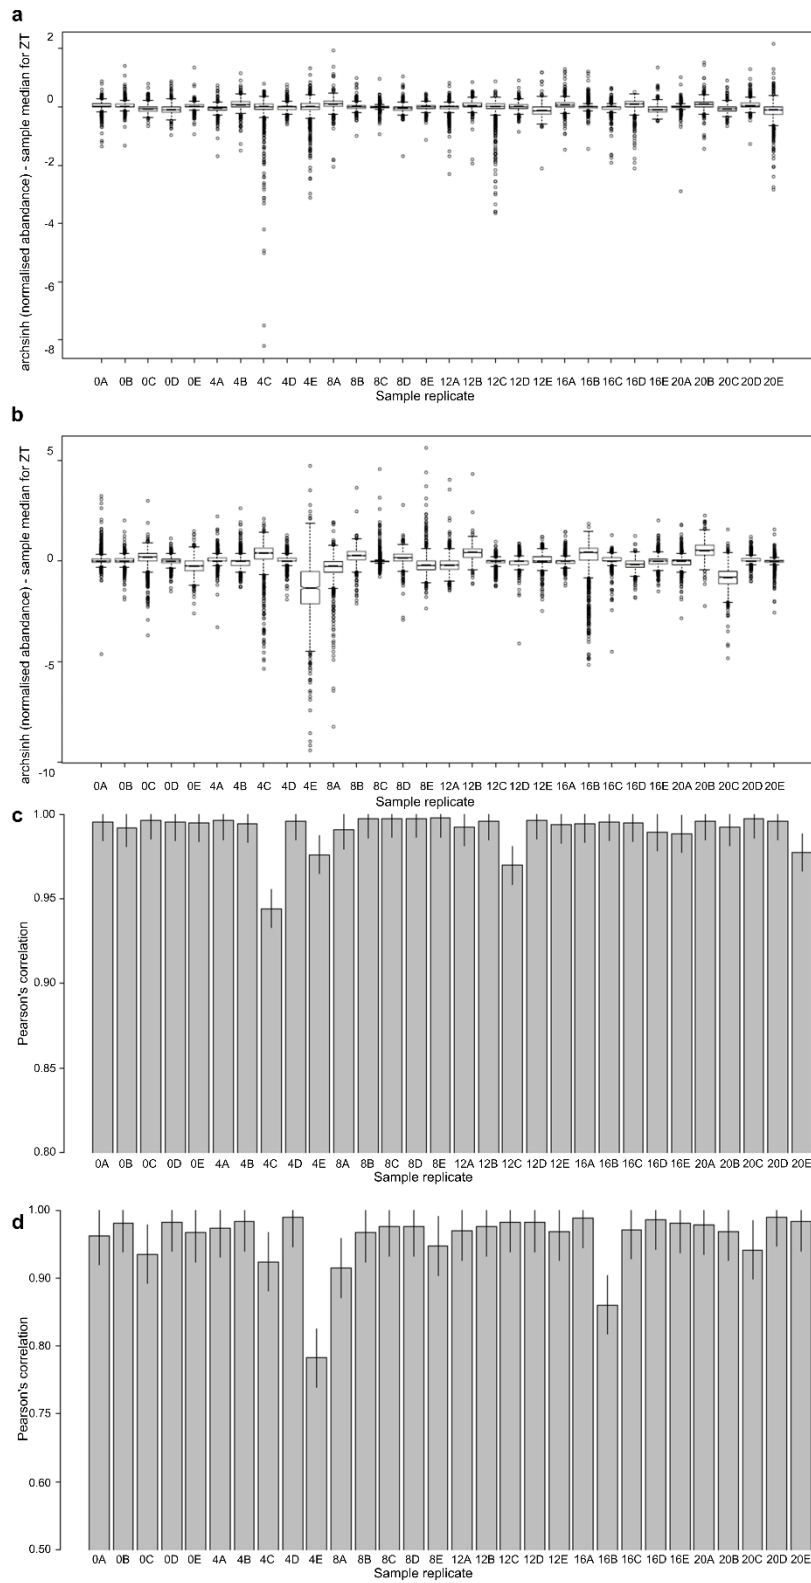

1207 **Supplementary Figure S2**

1208

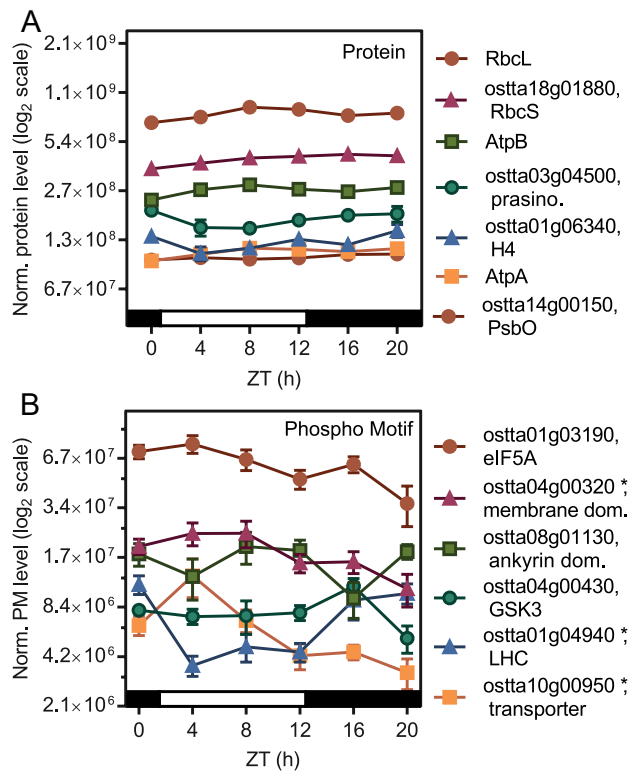

1209 **Supplementary Figure S3**  
1210

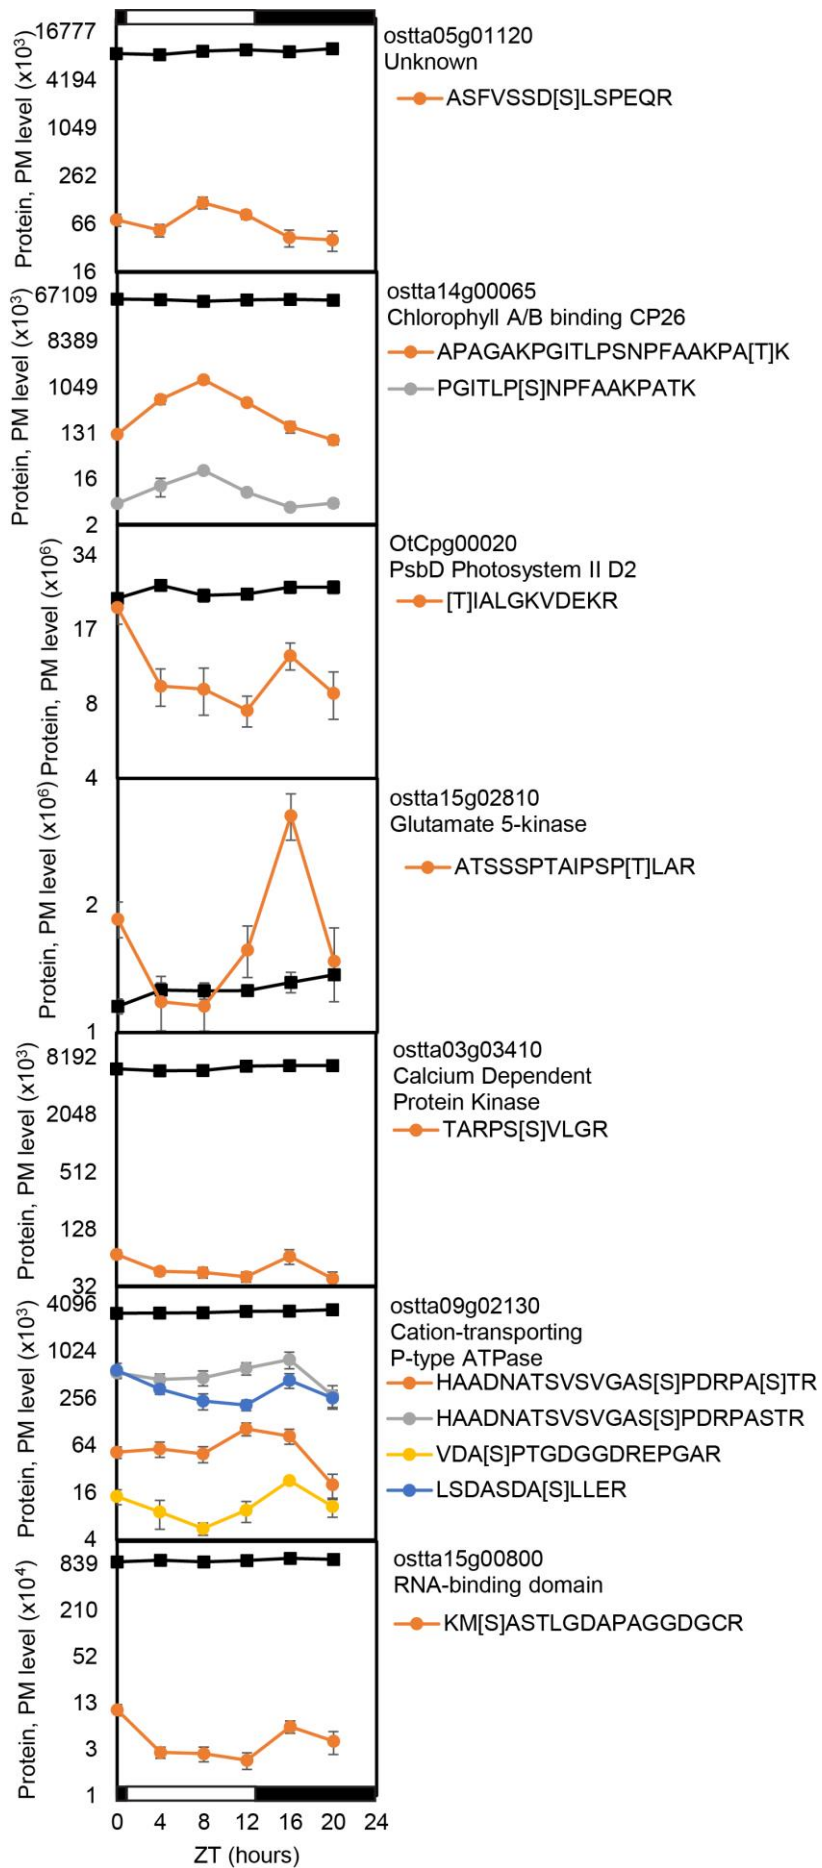

1211 **Supplementary Figure S4**

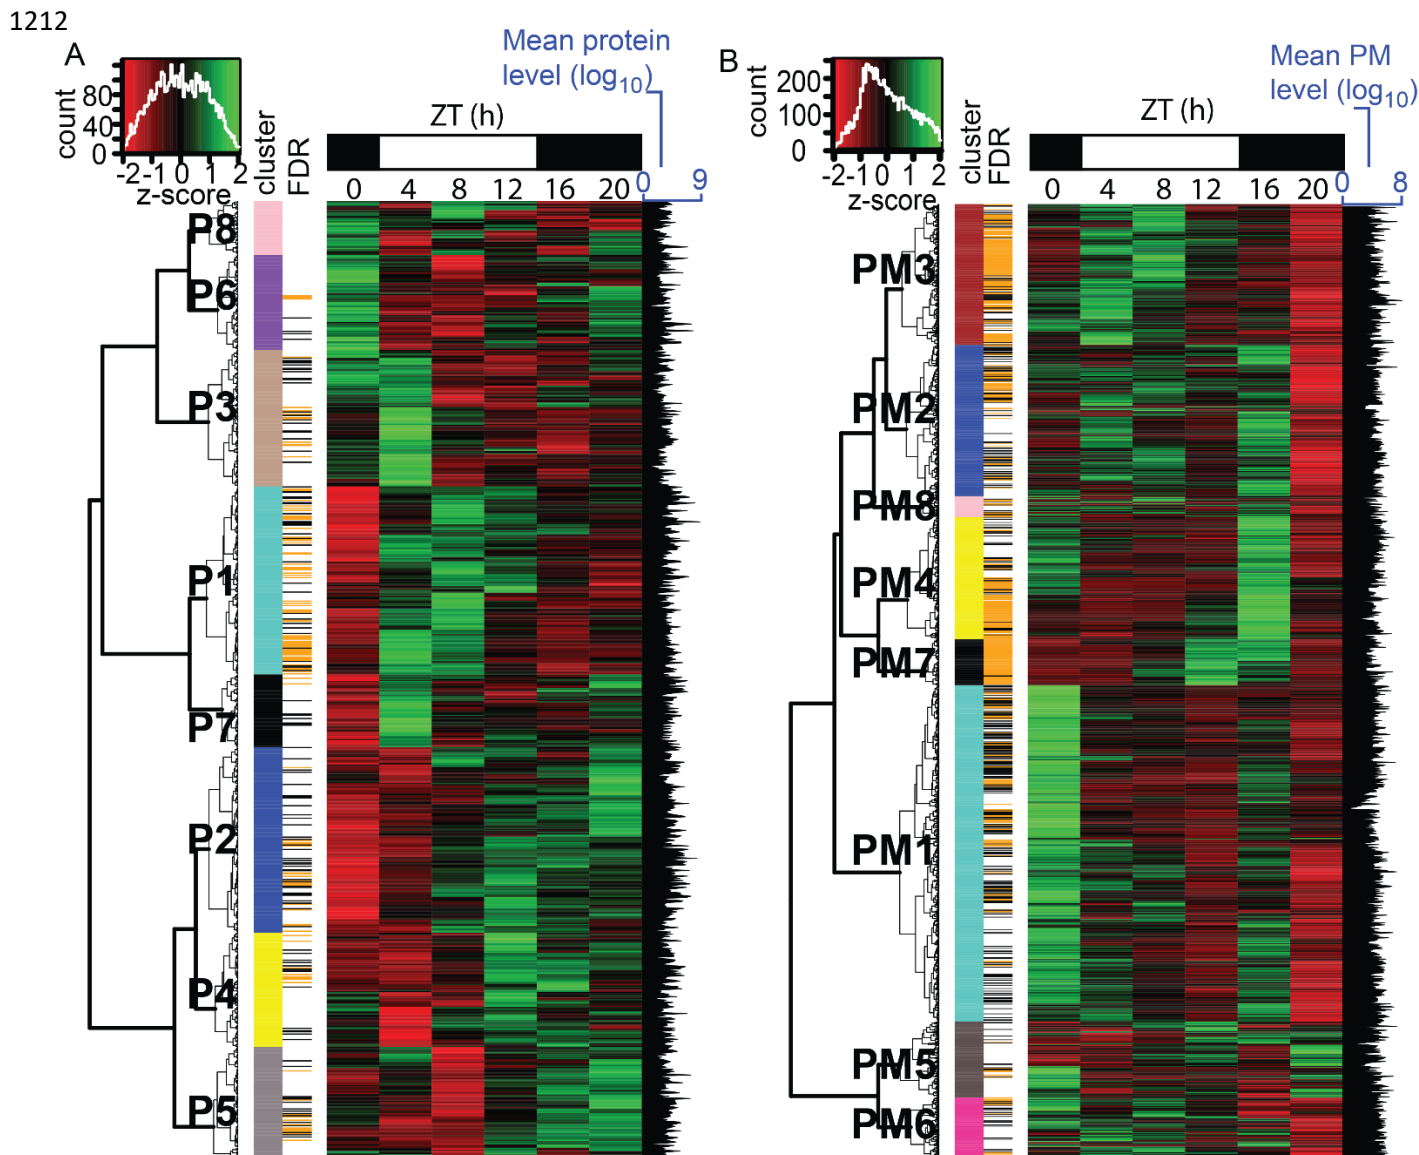

**C PROTEIN CLUSTERS**

**P1** Ribosomal subunits, translation initiation/elongation  
**P2** Thioredoxin-like, FNR, PGK, GAPDH, RuBisCO, PPK, malate dehydrogenase CBM20, PLP transferase  
**P3** Chlorophyll A/B binding, PSII PsbM  
**P4** PLP transferases, SSII  
**P5** Thioredoxin-like, SQR/FR cytochrome b5, phosphogluconate dehydrogenase, transaldolase, aldehyde dehydrogenase  
**P6** Prasinophyte specific,  $\text{NH}_4^+$  transporter  
**P7** Cytochrome b6, ribosomal subunits, translation initiation/elongation

**D PHOSHOPEPTIDE MOTIF CLUSTERS**

**PM1** TFs, ZF, Myb; cold-shock protein; Zn, Na/solute,  $\text{Mg}^{2+}$ , transport; AGC, YAK1, CAMK-like, RIO2, CDPK; PIPK; PsaM  
**PM2** TFs, ZF; eIFs; MAPK, APG1, NDR, AGC, CAMK-like; PP2C; 6-phosphofructo-2-kinase; Ca ATPase  
**PM3** TFs, ZFs; eIFs; chlorophyll A/B binding, RubisCO activase; thioredoxin; K, Mg, ABC transport; FHA; AGC, SRPK, CDKA, CDKC; PIPK  
**PM4** TFs ZF; PEP carboxylase proteasome;  $\text{NO}_3^-$ , Mg transport; WEE1, IRE, MAPK; PIPK  
**PM5** TFs, CO; GAPDH; chlorophyll A/B binding; Asn synthetase; T6P synthase;  
**PM6** eIFs, ribosome biogenesis; S6K; PIPK, dacylglycerol kinase  
**PM7** CDKA, CDKB, GSK3; PPK; phospholipid ATPase  
**PM8** WNK1, EDR1, CDK regulatory subunit



1213 **Supplementary Figure**  
 1214 **S5**  
 1215

**a Protein - Biological Process**

| ZT | GO.ID      | Term                                              | Annotated | Significant | Expected | p-value  |
|----|------------|---------------------------------------------------|-----------|-------------|----------|----------|
| 0  | GO:0098662 | inorganic cation transmembrane transport          | 17        | 1           | 0.1      | 9.40E-02 |
|    | GO:0006412 | translation                                       | 116       | 17          | 6.8      | 1.30E-04 |
| 4  | GO:0006412 | translation                                       | 116       | 16          | 4.82     | 1.30E-06 |
|    | GO:0006414 | translational elongation                          | 8         | 2           | 0.33     | 4.00E-02 |
|    | GO:0006260 | DNA replication                                   | 3         | 3           | 0.04     | 1.40E-06 |
| 8  | GO:0015995 | chlorophyll biosynthetic process                  | 7         | 4           | 0.24     | 3.10E-05 |
|    | GO:0006414 | translational elongation                          | 8         | 2           | 0.27     | 2.70E-02 |
|    | GO:0006412 | translation                                       | 116       | 9           | 3.95     | 3.00E-02 |
|    | GO:0006418 | tRNA aminoacylation for protein translation       | 15        | 1           | 0.03     | 2.80E-02 |
| 12 | GO:0006260 | DNA replication                                   | 3         | 3           | 0.07     | 1.20E-05 |
|    | GO:1901606 | alpha-amino acid catabolic process                | 5         | 2           | 0.12     | 4.50E-02 |
|    | GO:0090150 | establishment of protein localization to membrane | 4         | 1           | 0.02     | 2.30E-02 |
| 20 | GO:0015995 | chlorophyll biosynthetic process                  | 7         | 1           | 0.04     | 3.90E-02 |
|    | GO:0006414 | translational elongation                          | 8         | 1           | 0.05     | 4.50E-02 |

**b Phosphopeptide motifs - Biological Process**

| ZT         | GO.ID                                             | Term                                                           | Annotated                                  | Significant | Expected | p-value  |          |
|------------|---------------------------------------------------|----------------------------------------------------------------|--------------------------------------------|-------------|----------|----------|----------|
| 0          | GO:0035556                                        | intracellular signal transduction                              | 17                                         | 6           | 3.38     | 3.10E-03 |          |
|            | GO:0046488                                        | phosphatidylinositol metabolic process                         | 6                                          | 4           | 1.19     | 8.10E-03 |          |
|            | GO:0006457                                        | protein folding                                                | 4                                          | 3           | 0.79     | 1.55E-02 |          |
|            | GO:0006413                                        | translational initiation                                       | 4                                          | 3           | 0.79     | 1.55E-02 |          |
|            | GO:0006468                                        | protein phosphorylation                                        | 48                                         | 14          | 9.53     | 1.62E-02 |          |
|            | GO:0050896                                        | response to stimulus                                           | 34                                         | 11          | 6.75     | 2.49E-02 |          |
|            | GO:0034622                                        | cellular macromolecular complex assembly                       | 5                                          | 3           | 0.99     | 2.69E-02 |          |
|            | GO:0055085                                        | transmembrane transport                                        | 38                                         | 12          | 7.55     | 3.23E-02 |          |
|            | GO:0015031                                        | protein transport                                              | 22                                         | 7           | 4.37     | 3.29E-02 |          |
|            | GO:0006352                                        | DNA-templated transcription, initiation                        | 5                                          | 3           | 0.99     | 3.42E-02 |          |
|            | GO:0006468                                        | protein phosphorylation                                        | 48                                         | 5           | 1.17     | 2.60E-03 |          |
|            | 4                                                 | GO:0055085                                                     | transmembrane transport                    | 38          | 11       | 3.97     | 1.20E-05 |
|            |                                                   | GO:0006355                                                     | regulation of transcription, DNA-templated | 22          | 8        | 2.3      | 7.50E-05 |
|            |                                                   | GO:0000160                                                     | phosphorelay signal transduction system    | 6           | 3        | 0.63     | 6.70E-03 |
| GO:0008152 |                                                   | metabolic process                                              | 231                                        | 29          | 24.15    | 1.20E-02 |          |
| GO:0072525 |                                                   | pyridine-containing compound biosynthetic process              | 3                                          | 2           | 0.31     | 1.57E-02 |          |
| GO:0044271 |                                                   | cellular nitrogen compound biosynthetic process                | 46                                         | 12          | 4.81     | 2.07E-02 |          |
| GO:0009108 |                                                   | coenzyme biosynthetic process                                  | 5                                          | 2           | 0.52     | 4.74E-02 |          |
| GO:0006355 |                                                   | regulation of transcription, DNA-templated                     | 22                                         | 6           | 1.3      | 6.10E-04 |          |
| GO:0009168 |                                                   | purine ribonucleoside monophosphate biosynthetic process       | 3                                          | 2           | 0.18     | 8.20E-03 |          |
| GO:0009152 |                                                   | purine ribonucleotide biosynthetic process                     | 4                                          | 2           | 0.24     | 1.58E-02 |          |
| GO:0046129 |                                                   | purine ribonucleoside biosynthetic process                     | 4                                          | 2           | 0.24     | 1.58E-02 |          |
| GO:0034654 |                                                   | nucleobase-containing compound biosynthetic process            | 40                                         | 10          | 2.37     | 4.11E-02 |          |
| GO:0006813 |                                                   | potassium ion transport                                        | 7                                          | 2           | 0.41     | 5.01E-02 |          |
| 8          |                                                   | GO:0006468                                                     | protein phosphorylation                    | 48          | 18       | 4.93     | 8.40E-10 |
|            | GO:0032012                                        | regulation of ARF protein signal transduction                  | 3                                          | 2           | 0.31     | 1.80E-02 |          |
|            | GO:0005992                                        | trehalose biosynthetic process                                 | 3                                          | 2           | 0.31     | 1.80E-02 |          |
|            | GO:0006355                                        | regulation of transcription, DNA-templated                     | 22                                         | 5           | 2.26     | 2.50E-02 |          |
|            | GO:0006511                                        | ubiquitin-dependent protein catabolic process                  | 3                                          | 2           | 0.13     | 4.10E-03 |          |
|            | GO:0007017                                        | microtubule-based process                                      | 4                                          | 2           | 0.17     | 8.00E-03 |          |
|            | GO:1901362                                        | organic cyclic compound biosynthetic process                   | 46                                         | 3           | 2        | 2.01E-02 |          |
|            | GO:0044238                                        | primary metabolic process                                      | 192                                        | 12          | 8.36     | 2.87E-02 |          |
|            | GO:0098662                                        | inorganic cation transmembrane transport                       | 9                                          | 2           | 0.39     | 4.29E-02 |          |
|            | 12                                                | GO:0006261                                                     | DNA-dependent DNA replication              | 3           | 2        | 0.11     | 3.10E-03 |
| GO:0006468 |                                                   | protein phosphorylation                                        | 48                                         | 5           | 1.84     | 1.58E-02 |          |
| GO:0006396 |                                                   | RNA processing                                                 | 7                                          | 2           | 0.27     | 1.98E-02 |          |
| GO:0006974 |                                                   | cellular response to DNA damage stimulus                       | 10                                         | 2           | 0.38     | 3.19E-02 |          |
| GO:0019219 |                                                   | regulation of nucleobase-containing compound metabolic process | 23                                         | 2           | 0.88     | 3.26E-02 |          |
| GO:0006457 |                                                   | protein folding                                                | 4                                          | 3           | 0.28     | 8.70E-04 |          |
| 16         | GO:0050896                                        | response to stimulus                                           | 34                                         | 6           | 2.37     | 2.99E-02 |          |
|            | GO:0008152                                        | metabolic process                                              | 231                                        | 27          | 16.1     | 4.15E-02 |          |
|            | GO:0006281                                        | DNA repair                                                     | 9                                          | 5           | 1.08     | 8.20E-04 |          |
|            | GO:0006310                                        | DNA recombination                                              | 4                                          | 3           | 0.48     | 3.65E-03 |          |
|            | GO:0009168                                        | purine ribonucleoside monophosphate biosynthetic process       | 3                                          | 2           | 0.36     | 2.82E-02 |          |
|            | GO:0006468                                        | protein phosphorylation                                        | 48                                         | 9           | 5.77     | 4.15E-02 |          |
| 20         | GO:0006355                                        | regulation of transcription, DNA-templated                     | 22                                         | 3           | 0.5      | 8.60E-03 |          |
|            | GO:0007165                                        | signal transduction                                            | 19                                         | 2           | 0.43     | 3.91E-02 |          |
|            | GO:0006412                                        | translation                                                    | 11                                         | 1           | 0.02     | 1.90E-02 |          |
|            | GO:0006468                                        | protein phosphorylation                                        | 48                                         | 28          | 16.64    | 2.80E-07 |          |
|            | GO:0055085                                        | transmembrane transport                                        | 38                                         | 20          | 13.17    | 7.50E-05 |          |
|            | GO:0006355                                        | regulation of transcription, DNA-templated                     | 22                                         | 13          | 7.63     | 5.60E-04 |          |
|            | GO:0008152                                        | metabolic process                                              | 231                                        | 105         | 80.09    | 8.70E-04 |          |
|            | GO:0016310                                        | phosphorylation                                                | 52                                         | 32          | 18.03    | 2.27E-03 |          |
|            | GO:0000160                                        | phosphorelay signal transduction system                        | 6                                          | 5           | 2.08     | 4.50E-03 |          |
|            | GO:0046488                                        | phosphatidylinositol metabolic process                         | 6                                          | 5           | 2.08     | 4.50E-03 |          |
|            | GO:0009058                                        | biosynthetic process                                           | 83                                         | 45          | 28.78    | 8.60E-03 |          |
|            | GO:0006796                                        | phosphate-containing compound metabolic process                | 76                                         | 42          | 26.35    | 9.00E-03 |          |
|            | GO:0044249                                        | cellular biosynthetic process                                  | 76                                         | 40          | 26.35    | 9.53E-03 |          |
|            | GO:0035556                                        | intracellular signal transduction                              | 17                                         | 13          | 5.89     | 1.31E-02 |          |
| GO:0006812 | cation transport                                  | 22                                                             | 11                                         | 7.63        | 1.45E-02 |          |          |
| GO:0006352 | DNA-templated transcription, initiation           | 5                                                              | 4                                          | 1.73        | 1.54E-02 |          |          |
| GO:0009108 | coenzyme biosynthetic process                     | 5                                                              | 4                                          | 1.73        | 1.54E-02 |          |          |
| GO:0072525 | pyridine-containing compound biosynthetic process | 3                                                              | 3                                          | 1.04        | 1.55E-02 |          |          |
| GO:0032012 | regulation of ARF protein signal transduction     | 3                                                              | 3                                          | 1.04        | 1.55E-02 |          |          |
| GO:0030258 | lipid modification                                | 3                                                              | 3                                          | 1.04        | 1.55E-02 |          |          |
| GO:0090407 | organophosphate biosynthetic process              | 9                                                              | 4                                          | 3.12        | 1.57E-02 |          |          |
| GO:0044711 | single-organism biosynthetic process              | 28                                                             | 14                                         | 9.71        | 4.57E-02 |          |          |

1216 **Supplementary Figure S6**

1217

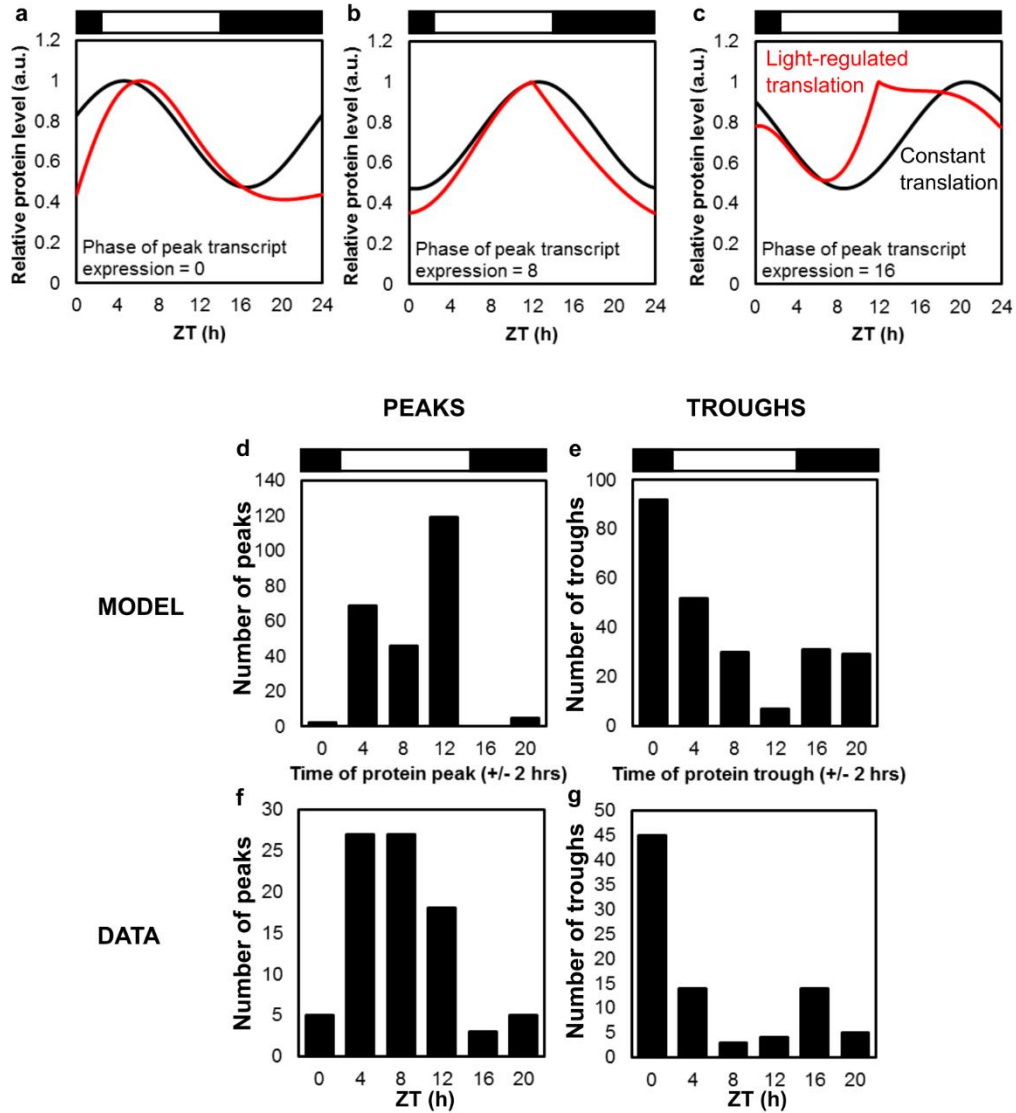

1218

1219

1220

1221 **Supplementary Figure S7**

1222

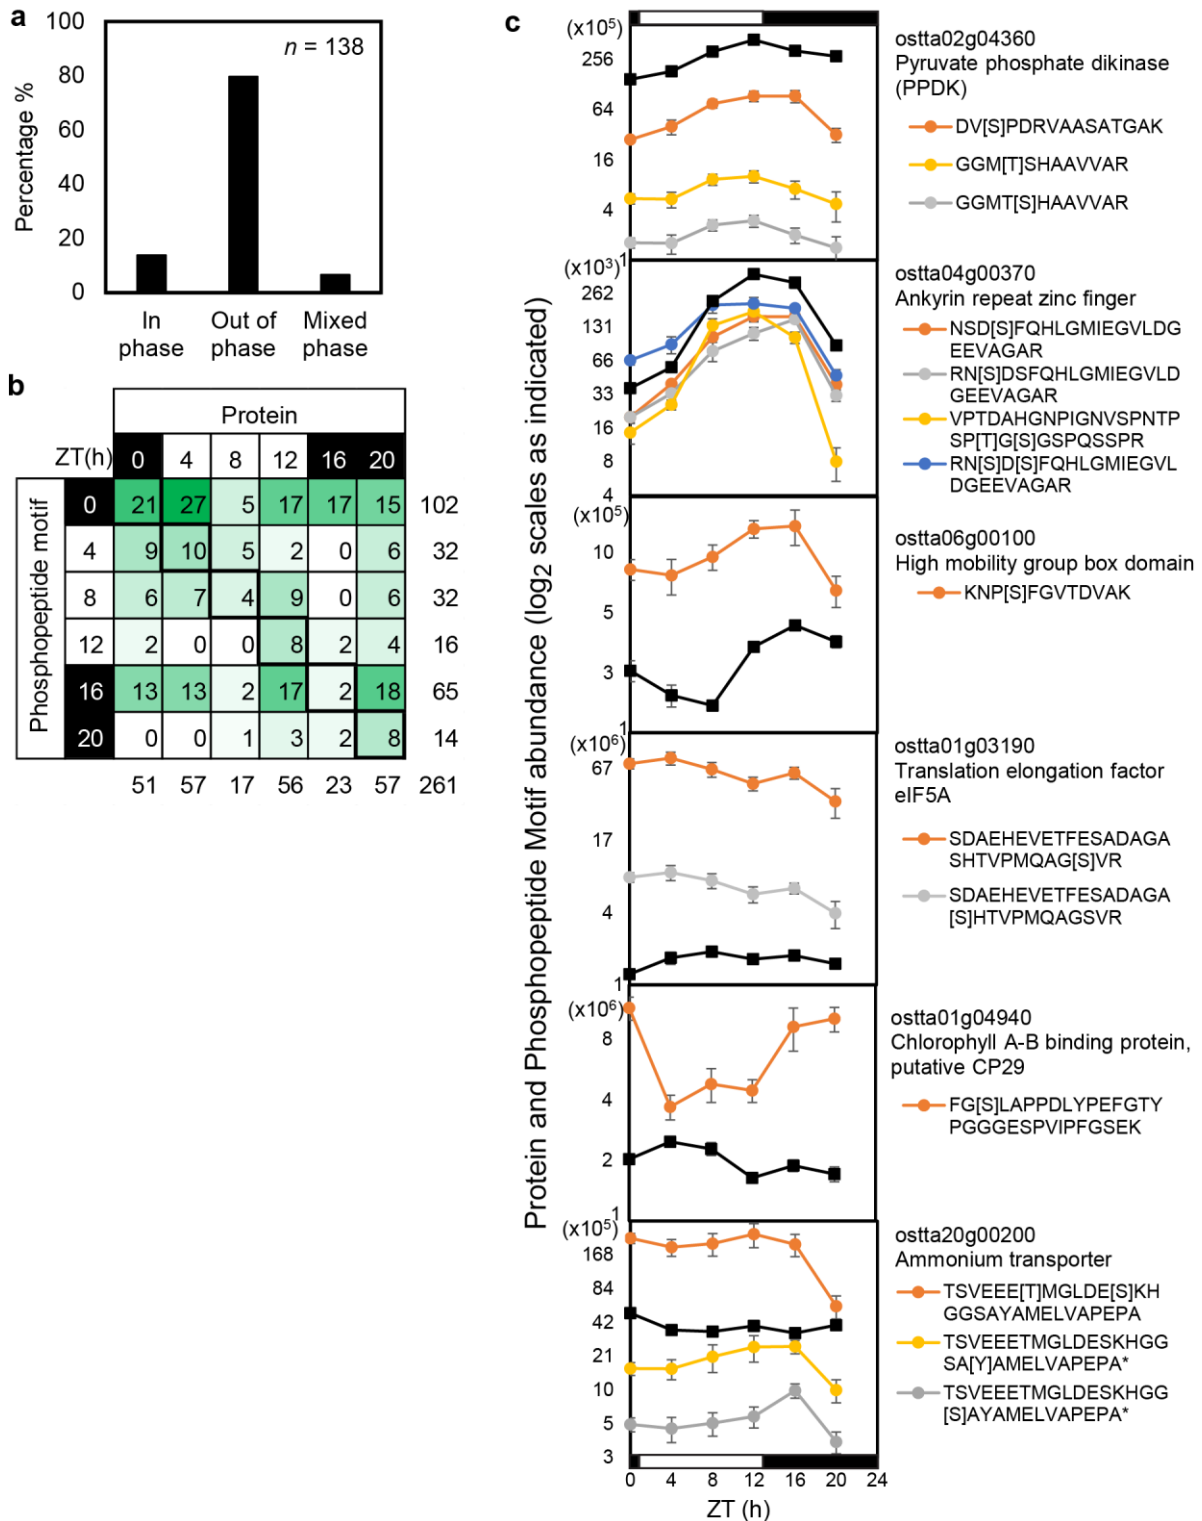

1223 **Supplementary Figure S8**

1224

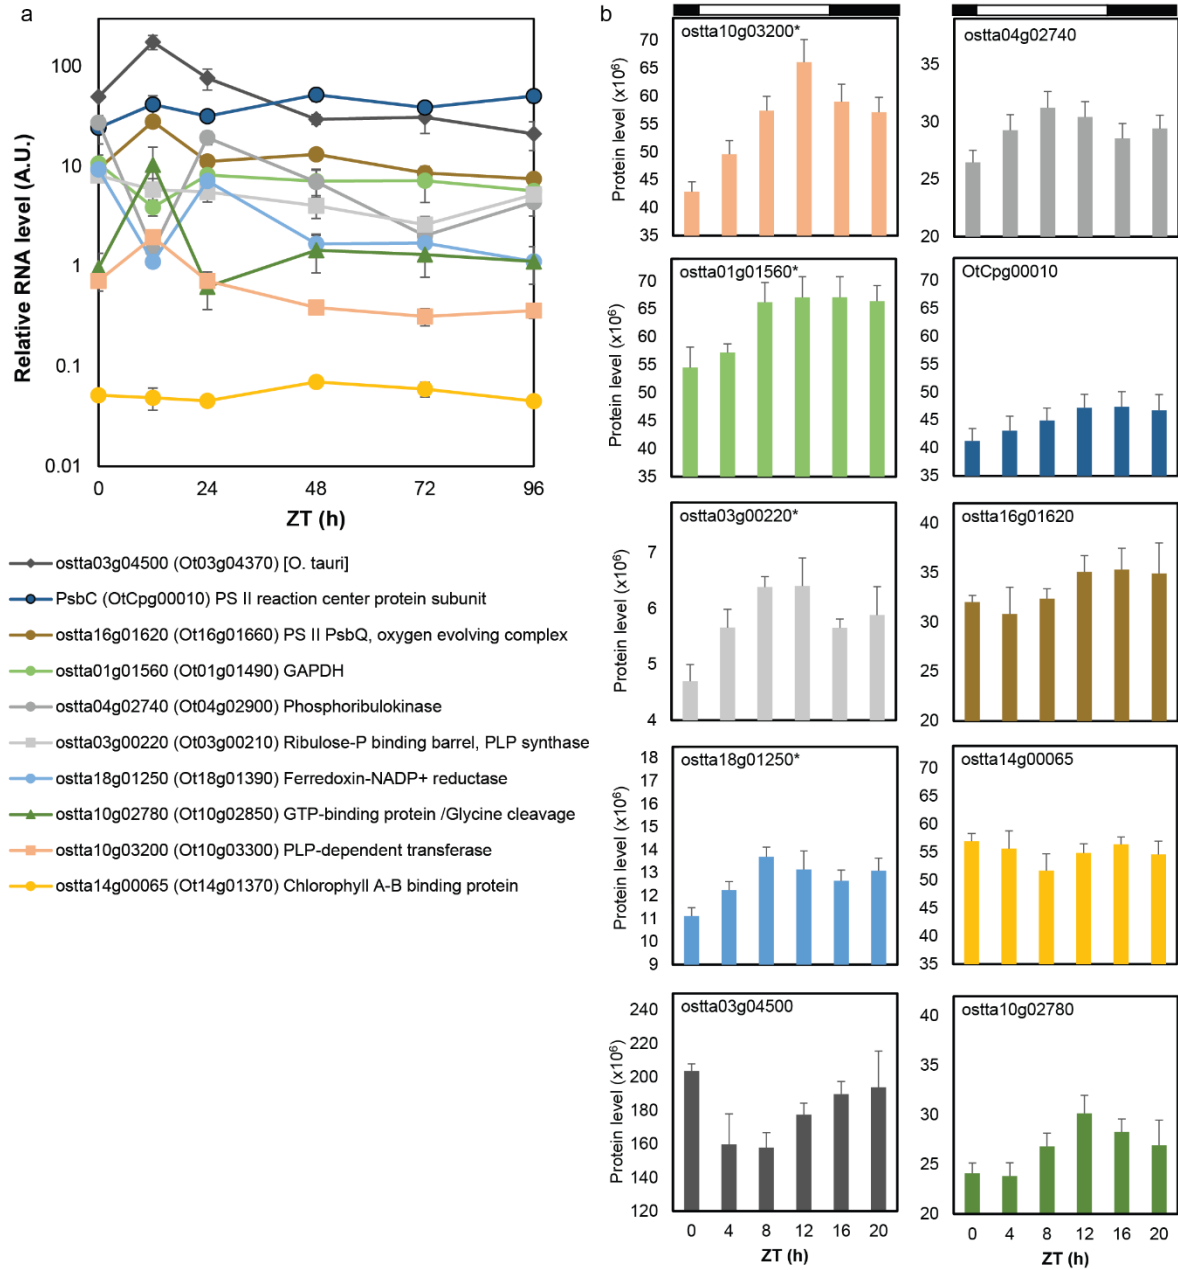

1225 **Supplementary Figure S9**

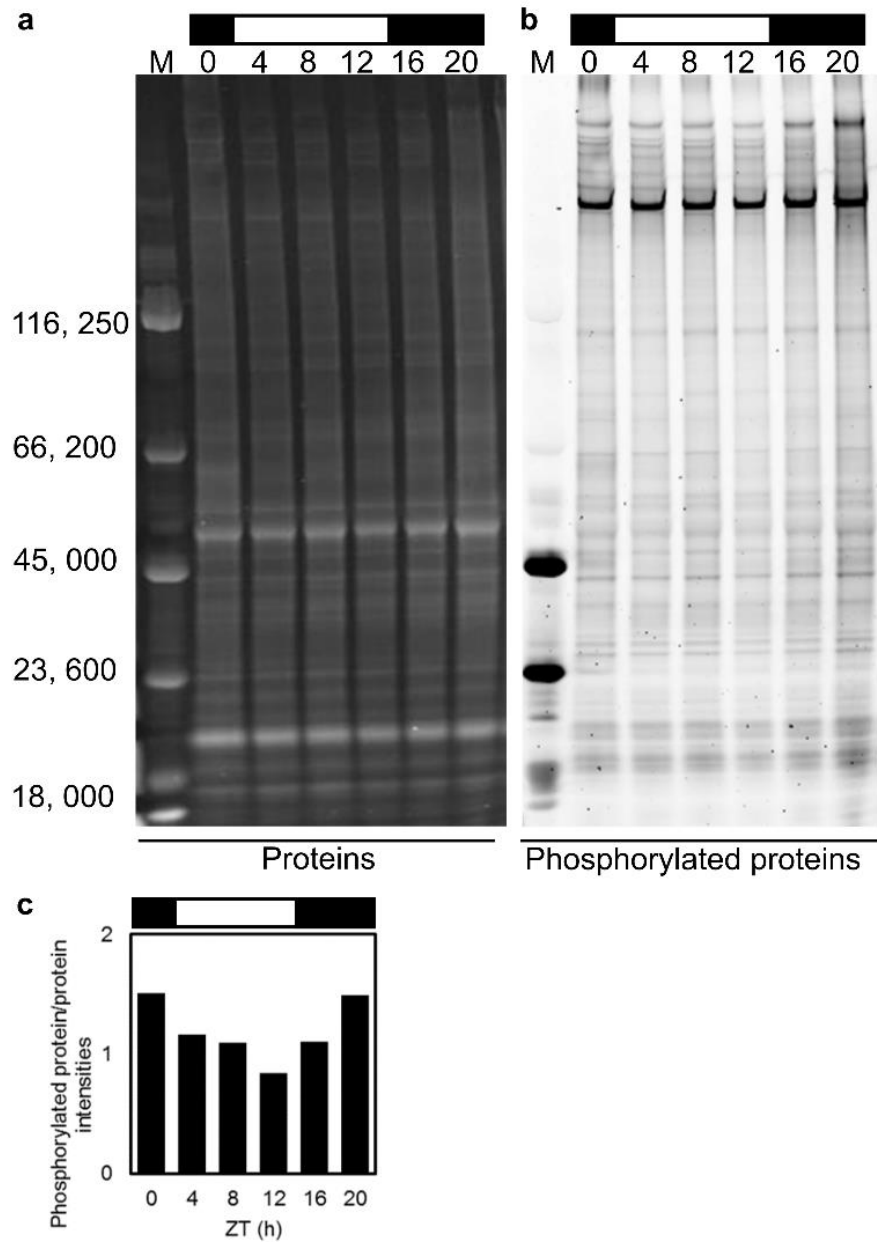



1226 **Supplementary Figure S10**

1227

1228

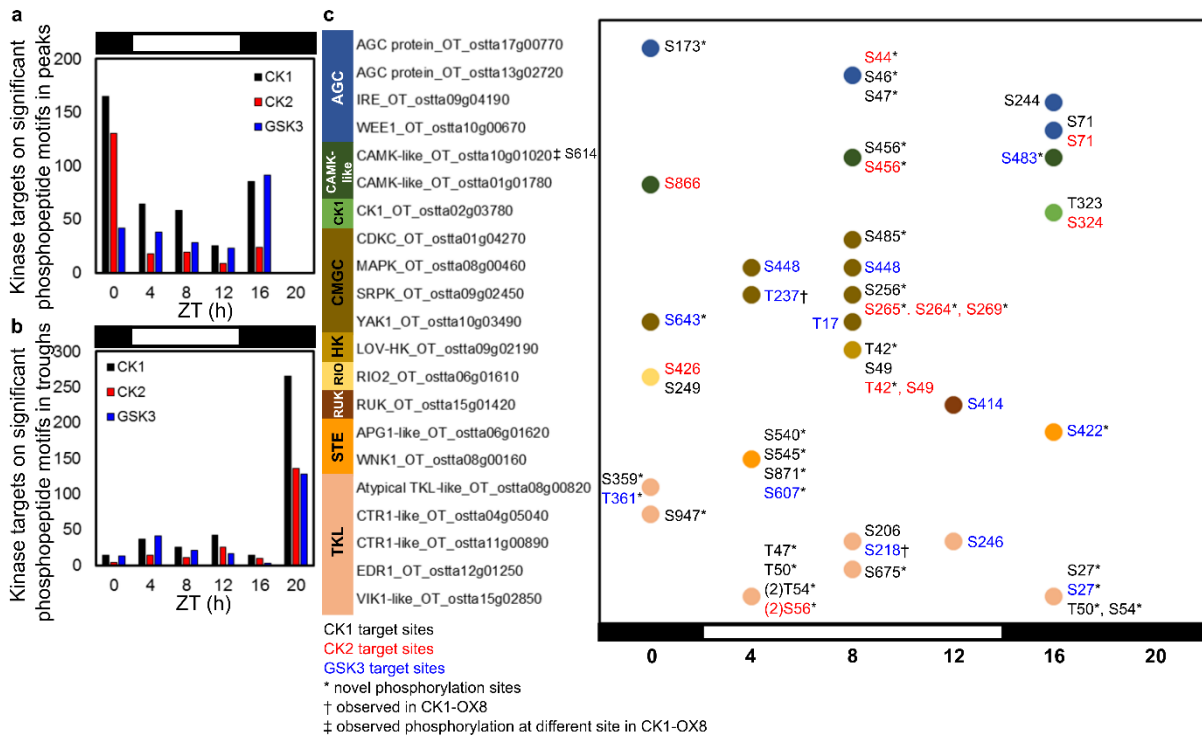

1229 **Supplementary Figure S11**

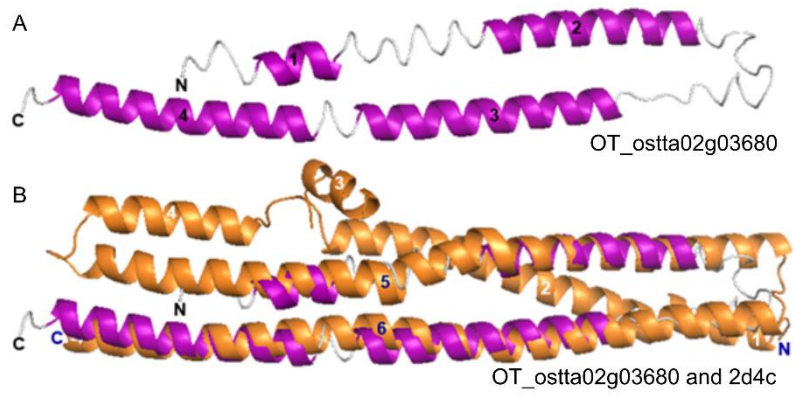

Source: https://www.biorxiv.org/content/10.1101/287862v2.full.pdf
